1 **Activation of TIR signaling is required for pattern-triggered immunity**

2

3 Hainan Tian<sup>1\*</sup>, Siyu Chen<sup>1,2\*</sup>, Zhongshou Wu<sup>1,3\*</sup>, Kevin Ao<sup>1,3</sup>, Hoda Yaghmaiean<sup>1</sup>,  
4 Tongjun Sun<sup>1</sup>, Weijie Huang<sup>1</sup>, Fang Xu<sup>1,3,4</sup>, Yanjun Zhang<sup>1,3,5</sup>, Shucui Wang<sup>6</sup>, Xin Li<sup>1,3</sup>,  
5 and Yuelin Zhang<sup>1</sup>

6 <sup>1</sup> Department of Botany, University of British Columbia, Vancouver BC V6T 1Z4,  
7 Canada

8 <sup>2</sup> Key Laboratory of Molecular Epigenetics of MOE & Institute of Genetics and  
9 Cytology, Northeast Normal University, Changchun, Jilin 130024, China

10 <sup>3</sup> Michael Smith Laboratories, University of British Columbia, Vancouver BC V6T  
11 1Z4, Canada

12 <sup>4</sup> The Key Laboratory of Plant Development and Environmental Adaptation Biology,  
13 Ministry of Education, School of Life Sciences, Shandong University, Qingdao  
14 266237, China

15 <sup>5</sup> Institute of Plant Genetics and Developmental Biology, College of Chemistry and  
16 Life Sciences, Zhejiang Normal University, Jinhua, Zhejiang 321004, China

17 <sup>6</sup> College of Life Science, Linyi University, Linyi 276005, China

18 \* These authors contributed equally to the described work.

19 For correspondence: yuelin.zhang@botany.ubc.ca; xinli@mssl.ubc.ca

20

21

22

23 **Abstract**

24 Plant immune responses are mainly activated by two types of receptors. Plasma  
25 membrane-localized pattern recognition receptors (PRRs) recognize conserved  
26 features of microbes, and intracellular nucleotide-binding leucine rich repeat receptors  
27 (NLRs) recognize effector proteins from pathogens. NLRs possessing N-terminal  
28 Toll/interleukin-1 receptor (TIR) domains (TNLs) activate two parallel signaling  
29 pathways via the EDS1/PAD4/ADR1s and the EDS1/SAG101/NRG1s modules. The  
30 relationship between PRR-mediated pattern-triggered immunity (PTI) and TIR  
31 signaling is unclear. Here we report that activation of TIR signaling plays a key role in  
32 PTI. Blocking TIR signaling by knocking out components of the EDS1/PAD4/ADR1s  
33 and EDS1/SAG101/NRG1s modules results in attenuated PTI responses such as  
34 reduced salicylic acid (SA) levels and expression of defense genes, and compromised  
35 resistance against pathogens. Consistently, PTI is attenuated in transgenic plants that  
36 have reduced accumulation of NLRs. Upon treatment with PTI elicitors such as flg22  
37 and nlp20, a large number of genes encoding TNLs or TIR domain-containing  
38 proteins are rapidly induced, likely responsible for activating TIR signaling during  
39 PTI. In support, overexpression of some of these genes results in activation of defense  
40 responses. Overall, our study reveals that TIR signaling activation is an important  
41 mechanism for boosting plant defense during PTI.

42

43

44

45

46

## 47 **Introduction**

48 Immune receptors are essential for non-self recognition and defense activation in  
49 multicellular organisms <sup>1,2</sup>. Plants use pattern recognition receptors (PRRs), which  
50 include transmembrane receptor-like kinases (RLKs) and receptor-like proteins  
51 (RLPs), to detect conserved components of microbes collectively known as  
52 pathogen-associated molecular patterns (PAMPs), and activate pattern-triggered  
53 immunity (PTI) <sup>3</sup>. Unlike RLKs, RLPs do not have a cytoplasmic kinase domain and  
54 usually transduce defense signals through adaptor RLKs such as BRI1-ASSOCIATED  
55 RECEPTOR KINASE 1 (BAK1) and SUPPRESSOR OF BIR1 1 (SOBIR1) <sup>4</sup>. As an  
56 example, RLK FLAGELLIN-SENSITIVE 2 (FLS2) recognizes flg22, a conserved  
57 peptide from bacterial flagellin <sup>5,6</sup>. In contrast, *Arabidopsis* RLP23 recognizes a  
58 20-amino-acid motif (nlp20) widely found in most NECROSIS AND  
59 ETHYLENE-INDUCING PEPTIDE 1-LIKE PROTEINS (NLPs) of microbes <sup>7,8</sup>.  
60 RLP23 constitutively associates with SOBIR1 and binding of nlp20 induces formation  
61 of a tripartite complex consisting RLP23, SOBIR1, and BAK1, leading to activation  
62 of downstream immune signaling <sup>8</sup>.

63  
64 Activation of PTI typically leads to production of reactive oxygen species (ROS),  
65 activation of MITOGEN-ACTIVATED PROTEIN KINASES (MAPKs), increased  
66 biosynthesis of the defense hormone salicylic acid (SA) and up-regulation of  
67 defense-related genes <sup>9</sup>. Receptor-like cytoplasmic kinases (RLCKs), which have a  
68 kinase domain similar to RLKs but lack a transmembrane motif and extracellular  
69 ligand-binding domain, play crucial roles in transducing defense signals downstream  
70 of PRRs <sup>10</sup>.

71  
72 To promote virulence, microbial pathogens deliver a variety of effector proteins to  
73 interfere with PTI and facilitate nutrient acquisition from plants <sup>11</sup>. Recognition of  
74 these pathogen effectors by plant immune receptors leads to the activation of  
75 effector-triggered immunity (ETI). The majority of intracellular nucleotide-binding  
76 leucine-rich repeat proteins (NLRs) serve as sensors for effectors <sup>12</sup>. These sensor

77 NLRs (sNLRs) with an N-terminal coiled-coil (CC) domain or a Toll/interleukin-1  
78 receptor (TIR) domain are known as CNLs and TNLs, respectively. Distinct  
79 mechanisms are used by the CC and TIR domains to activate defense signaling. The  
80 CC domain of HOPZ-ACTIVATED RESISTANCE 1 (ZAR1) was suggested to form  
81 a narrow pore on the plasma membrane to trigger cell death and plant immunity<sup>13</sup>. On  
82 the other hand, the TIR domains of many TNLs were shown to possess nicotinamide  
83 adenine dinucleotide (NAD<sup>+</sup>) hydrolase (NADase) activity, which is required for  
84 activation of downstream immune responses<sup>14,15</sup>. Intriguingly, two small groups of  
85 helper NLRs (hNLRs) in the ADR1 and NRG1 family, which carry an N-terminal  
86 RESISTANCE TO POWDERY MILDEW 8 (RPW8)-like CC (CC<sub>R</sub>) domain, function  
87 downstream of TNLs<sup>16-21</sup>. ADR1s play a critical role in activating SA biosynthesis<sup>22</sup>,  
88 while NRG1s are required for TNL-induced cell death<sup>17,19</sup>. In addition, three related  
89 lipase-like proteins, EDS1 (ENHANCED DISEASE SUSCEPTIBILITY 1)/PAD4  
90 (PHYTOALEXIN DEFICIENT 4)/SAG101 (SENESCENCE-ASSOCIATED GENE  
91 101), also function downstream of TNLs<sup>23</sup>. EDS1 form distinct protein complexes  
92 with PAD4 or SAG101. The EDS1/PAD4 complex functions in the same defense  
93 pathway as ADR1s, whereas the EDS1/SAG101 complex works together with NRG1  
94 to promote cell death<sup>17,20</sup>.

95

96 SA plays diverse and critical roles in plant immunity<sup>24,25</sup>. It is required for PTI and  
97 ETI in local infection sites, as well as systemic acquired resistance (SAR), which  
98 confers protection against secondary infections in distal tissues. In *Arabidopsis*,  
99 pathogen-induced SA is mainly synthesized from isochorismate, which is produced  
100 from chorismate by ISOCHORISMATE SYNTHASE 1 (ICS1)<sup>26</sup>. PBS3 catalyzes the  
101 next step of conjugation of glutamate to isochorismate, and the resulting  
102 isochorismate-9-Glu subsequently decomposes to produce SA<sup>27,28</sup>. SAR-DEFICIENT  
103 1 (SARD1) and CALMODULIN BINDING PROTEIN 60g (CBP60g) are two major  
104 transcription factors regulating SA biosynthetic genes during pathogen infection<sup>29,30</sup>.  
105 Increased *SARD1* expression and SA accumulation are two early events downstream  
106 of PRR activation during PTI<sup>9</sup>.

107

108 NLR homeostasis control is essential for regulating ETI immune output.  
109 Ubiquitination plays crucial roles in regulating the NLR protein levels. For example,  
110 the turnover of the TNL SNC1 (SUPPRESSOR OF *npr1*, CONSTITUTIVE 1) and  
111 CNLs RPS2 (RESISTANCE TO *Pseudomonas syringae* 2) and SUMM2  
112 (SUPPRESSOR OF *mkk1 mkk2*, 2) is controlled by the Skp, Cullin, F-box (SCF) E3  
113 ligase SCF<sup>CPR131,32</sup>. Two other E3 ligases MUSE1 (MUTANT, *snc1*-ENHANCING 1)  
114 and MUSE2 promote the degradation of several TNLs which pair with SNC1<sup>33</sup>.  
115 Another E3 ligase UBR7 interacts with tobacco TNL N to control its levels<sup>34</sup>.  
116 Recently it was also shown that the homeostasis of sensor NLRs is broadly regulated  
117 by the redundant E3 ligases SNIPER1 (*snc1*-INFLUENCING PLANT E3 LIGASE  
118 REVERSE GENETIC SCREEN) and SNIPER2<sup>35</sup>. Overexpression of *SNIPER1* leads  
119 to globally reduced sNLR levels and attenuated ETI responses.

120

121 Immune signaling mediated by PRRs and NLRs has been studied separately in the  
122 past; the connection between them is rarely explored. In this study, we tested  
123 PAMP-induced responses in *Arabidopsis SNIPER1* overexpression lines and mutants  
124 deficient in TNL signaling. Inhibition of NLR accumulation or abolishment of TIR  
125 signaling resulted in reduced SA accumulation and compromised PTI, suggesting that  
126 activation of TIR signaling plays a crucial role in PTI.

127

## 128 **Results**

129

### 130 **PTI is compromised in *SNIPER1* overexpression lines**

131 Overexpression of *SNIPER1* leads to reduced accumulation of sNLRs and  
132 compromised ETI<sup>35</sup>. To test whether PTI is affected in *SNIPER1* overexpression lines,  
133 we challenged them with *Pseudomonas syringae* pv. *tomato* (*Pto*) DC3000 *hrcC*, a  
134 bacterial strain unable to secrete effectors due to a defect in the type III secretion  
135 system. Growth of *Pto* DC3000 *hrcC* was significantly higher in the *SNIPER1*  
136 overexpression lines than in wild type (WT) plants (Figure 1A). As no effectors can

137 be delivered into host cells by *Pto* DC3000 *hrcC*, enhanced growth of this strain in the  
138 *SNIPER1* overexpression lines suggests a PTI deficiency. Next, we examined if other  
139 PTI responses are affected in these *SNIPER1* overexpression lines. Two  
140 defense-related genes *SARD1* and *FMO1* (*FLAVIN-CONTAINING*  
141 *MONOOXYGENASES*) are quickly induced upon infection. The expression levels of  
142 *SARD1* and *FMO1* after infection by *Pto* DC3000 *hrcC* were significantly reduced in  
143 the *SNIPER1* overexpression lines compared to WT (Figure 1B-C). Furthermore, we  
144 measured the SA accumulation induced by *Pto* DC3000 *hrcC*. Both free and  
145 glucose-conjugated SA (SAG) levels in the *SNIPER1* overexpression lines were  
146 significantly lower than those in the WT plants upon *Pto* DC3000 *hrcC* treatment  
147 (Figure 1D, S1A). Taken together, these data suggest that a general reduction of sNLR  
148 accumulation due to *SNIPER1* overexpression leads to compromised PTI.

149

#### 150 **Immune responses induced by nlp20 or flg22 are attenuated in *SNIPER1*** 151 **overexpression lines**

152 The PTI defects of *SNIPER1* overexpression lines prompted us to test whether  
153 *SNIPER1* overexpression affects immune responses induced by the specific PAMP  
154 elicitors nlp20 and flg22. To our surprise, the induction of *SARD1* and *FMO1* by  
155 nlp20 or flg22 treatment was greatly reduced in the *SNIPER1* overexpression lines  
156 compared with WT (Figure 1E and 1F). In addition, SA and SAG levels after nlp20  
157 and flg22 treatment were also significantly lower in the *SNIPER1* overexpression  
158 lines than in WT (Figure 1G and 1H, S1B and S1C).

159

160 Treatment of nlp20 in local tissues can induce disease resistance in local and distal  
161 tissue upon subsequent infection<sup>8</sup>. To determine whether overexpression of *SNIPER1*  
162 affects nlp20-induced immunity, we first infiltrated two local leaves with 1  $\mu$ M nlp20  
163 and sprayed the whole plants with spores of virulent oomycete *Hyaloperonospora*  
164 *arabidopsidis* (*Hpa*) Noco2 one day later. nlp20 treatment induced strong resistance  
165 against *Hpa* Noco2 in both the local and distal leaves of WT plants (Figure 1I and 1J).  
166 However, the nlp20-induced local as well as systemic resistance to *Hpa* Noco2 were

167 largely impaired in the *SNIPER1* overexpression lines. Together, these data revealed  
168 that a general reduction of sNLRs levels due to *SNIPER1* overexpression results in  
169 compromised nlp20 and flg22-induced immune responses.

170

### 171 **TNL Signaling components are required for defense against *Pto* DC3000 *hrcC***

172 As SNIPER1 has been shown to target several TNLs for ubiquitination and  
173 degradation<sup>35</sup>, we further tested whether activation of TNL signaling is required for  
174 PTI. *Pto* DC3000 *hrcC*-induced defense responses were examined in TNL signaling  
175 mutants including *eds1-24*, *pad4-1*, *sag101-1*, *adr1 adr1-L1 adr1-L2* (*adr1 triple*) and  
176 *nrg1a nrg1b nrg1c* (*nrg1 triple*) mutants. The induction of *SARD1* by *Pto* DC3000  
177 *hrcC* was almost completely blocked in *eds1-24*, *pad4-1* and *adr1 triple* mutant plants,  
178 while no change in induction was observed in the *sag101-1* and *nrg1 triple* mutants  
179 compared with the WT (Figure S2A). Similarly, the induction of *FMO1* is greatly  
180 reduced in *eds1-24*, *pad4-1* and *adr1 triple*, but hardly affected in *sag101-1* and *nrg1*  
181 *triple* mutant plants (Figure S2B).

182

183 We further measured SA accumulation following *Pto* DC3000 *hrcC* infection in these  
184 TNL signaling mutants. Both SA and SAG levels in *eds1-24*, *pad4-1* and *adr1 triple*  
185 after *Pto* DC3000 *hrcC* treatment were much lower than in the WT (Figure 2A, S2C).  
186 This is consistent with the known contributions of EDS1, PAD4 and the ADR1s to  
187 pathogen-induced SA biosynthesis. To our surprise, the SA levels after *Pto* DC3000  
188 *hrcC* treatment were also significantly reduced in *sag101-1* and *nrg1 triple* mutant  
189 plants, although the reduction was not as dramatic as in *eds1-24*, *pad4-1* and *adr1*  
190 *triple*. Consistent with the difference in SA levels, growth of *Pto* DC3000 *hrcC* was  
191 significantly higher in *sag101-1* and *nrg1 triple* than in WT, and further increased in  
192 *eds1-24*, *pad4-1* and *adr1 triple* leaves (Figure 2B). Taken together, PTI responses are  
193 significantly attenuated in TNL signaling mutants, indicating a key contribution of  
194 TIR signaling to PTI.

195

### 196 **flg22-induced immune responses are attenuated in TNL signaling mutants**

197 We then tested PTI responses induced by specific elicitors in the TNL signaling  
198 mutants. To determine whether flg22-induced defense responses require TIR signaling,  
199 we first compared *SARD1* and *FMO1* induction by flg22 treatment. The expression  
200 levels of both *SARD1* and *FMO1* after flg22 treatment were considerably lower in  
201 *eds1-24*, *pad4-1* and *adr1 triple* mutant plants (Fig S2D and S2E). In contrast, the  
202 expression of *SARD1* was not affected whereas *FMO1* induction was modestly  
203 reduced in *sag101-1* and *nrg1 triple*. We also compared the accumulation of SA and  
204 SAG after flg22 treatment in WT and the TNL signaling mutants. The SA and SAG  
205 levels in *eds1-24*, *pad4-1* and *adr1 triple* plants treated with flg22 were much lower  
206 than in the WT (Figure 2C, S2F). Interestingly, the SA levels in *sag101-1* and *nrg1*  
207 *triple* were also significantly lower compared to the WT, but the difference is not as  
208 dramatic as in *eds1-24*, *pad4-1* and *adr1 triple* plants. Consistent with the reduced SA  
209 levels, flg22-induced resistance against *Pto* DC3000 was also compromised in  
210 *eds1-24*, *pad4-1* and *adr1 triple*, as well as in *sag101-1* and *nrg1 triple* mutant plants,  
211 although to a lesser extent (Figure 2D). Taken together, activation of TIR signaling  
212 contributes to flg22-induced immune responses.

213

#### 214 **nlp20-induced immunity is lost in TNL signaling mutants**

215 To determine whether TIR signal components are required for nlp20-induced immune  
216 responses, we first examined nlp20-induced *SARD1* and *FMO1* expression in *eds1-24*,  
217 *pad4-1*, *sag101-1*, *adr1 triple* and *nrg1 triple* mutants. The induction of *SARD1* and  
218 *FMO1* by nlp20 was dramatically reduced in *eds1-24*, *pad4-1* and *adr1 triple* mutant  
219 plants, but hardly affected in *sag101-1* and *nrg1 triple* (Figure S2G and S2H). We  
220 then measured nlp20-induced SA accumulation in these TNL signaling mutants. The  
221 SA and SAG levels after nlp20 treatment were much lower in *eds1-24*, *pad4-1* and  
222 *adr1 triple* plants, and moderately lower in *sag101-1* and *nrg1 triple* than in WT  
223 (Figure 2E and S2I). Consistent with the reduced SA accumulation, nlp20-induced  
224 resistance against *Hpa* Noco2 in both local and distal tissue was attenuated in  
225 *sag101-1* and *nrg1 triple* and almost completely blocked in *eds1-24*, *pad4-1* and *adr1*  
226 *triple* (Figure 2F and S3). Taken together, activation of TIR signaling is required for



227 nlp20-induced immunity.

228

229 **Overexpression of genes encoding TIR domain-containing proteins activates**  
230 **defense responses**

231 To understand how TIR signaling is activated during PTI, we analyzed the expression  
232 of genes encoding TIR domain-containing proteins (*TIR* genes) in response to nlp20  
233 or flg22 using previously reported RNA-sequencing datasets<sup>36,37</sup>. 26 *TIR* genes were  
234 found to be significantly induced 1 h after nlp20 treatment (Table S1). 14 *TIR* genes  
235 were considerably induced 6 h after applying nlp20 (Table S2). With flg22 treatment,  
236 46 *TIR* genes were significantly up-regulated within 30 min (Table S3). These  
237 findings suggest that a large number of *TIR* genes are rapidly induced upon PTI  
238 activation.

239

240 To test whether up-regulation of *TIR* genes can activate defense responses, we  
241 transiently expressed three *TIR* genes induced by both nlp20 and flg22 in *Nicotiana*  
242 *benthamiana*. Among them, *AT4G11170* and *AT3G04220* encode full-length TNLs  
243 and *AT2G32140* encodes a protein with only the TIR domain. Overexpression of all  
244 three *TIR* genes in *N. benthamiana* leads to activation of cell death around 48 hours  
245 after *Agrobacteria* infiltration (Figure 3A). To determine whether overexpression of  
246 these three *TIR* genes activates SA biosynthesis, we measured SA levels in samples  
247 collected 24 hours and 36 hours after infiltration of the *Agrobacteria* strains, when no  
248 macroscopic cell death was visible. In agreement, overexpression of these *TIR* genes  
249 in *N. benthamiana* indeed resulted in dramatic increase in SA and SAG levels in *N.*  
250 *benthamiana* (Figure 3B, S4).

251

252 Since Ca<sup>2+</sup> influx is one of the earliest events during PTI, we further examined  
253 whether it is involved in activation of the *TIR* genes. To determine whether Ca<sup>2+</sup>  
254 influx is required for nlp20-induced up-regulation of the three *TIR* genes, we  
255 pretreated *Arabidopsis* seedling with GdCl<sub>3</sub> to block the Ca<sup>2+</sup> channels prior to nlp20  
256 treatment. Consistent with the RNA-sequencing datasets, treatment with nlp20 or

257 flg22 alone leads to rapid induction of the three *TIR* genes. However, this induction  
258 was completely blocked by GdCl<sub>3</sub> (Figure 3C-D), suggesting that activation of Ca<sup>2+</sup>  
259 signaling is required for the induction of *TIR* genes.

260

### 261 **nlp20-induced immunity requires the RLCKs PCRK1/2 and PBL19/20**

262 RLCKs PCRK1/2 and PBL19/20 were known to function downstream of PRR  
263 receptor kinases such as FLS2 and CERK1<sup>38-40</sup>. To determine whether they are  
264 required for nlp20-induced immunity, we compared growth of *Hpa* Noco2 on WT,  
265 *pcrk1/2*, *pcrk1/2 pbl19* and *pcrk1/2 pbl19/20* quadruple mutant plants after treatment  
266 with nlp20. nlp20-induced local and systemic resistance against *Hpa* Noco2 was  
267 compromised in *pcrk1/2* and *pcrk1/2 pbl19*, and almost completely blocked in *pcrk1/2*  
268 *pbl19/20* (Figure 4A, S5A). Similarly, nlp20-induced resistance against *Pto* DC3000  
269 was also severely compromised in the *pcrk1/2 pbl19/20* quadruple mutant (Figure  
270 S5B). In addition, the increased SA and SAG levels after nlp20 treatment were  
271 significantly reduced in *pcrk1/2 pbl19/20* than in the WT (Figure 4B and S5C).  
272 Further RT-qPCR analysis showed that nlp20-induced *SARD1* and *FMO1* expression  
273 was dramatically reduced in *pcrk1/2 pbl19/20* mutant plants (Figure S5D and S5E).  
274 Moreover, induction of the three above-mentioned *TIR* genes was blocked in *pcrk1/2*  
275 *pbl19/20* (Figure 4C). Together these data indicate that PCRK1/2 and PBL19/20 are  
276 required for nlp20-induced immunity and they act upstream of the early induction of  
277 *TIR* genes.

278

279 Since SOBIR1 works together with the nlp20 receptor RLP23 in nlp20-activated PTI  
280 signal transduction<sup>8</sup>, one question is whether PCRK1/2 and PBL19/20 function  
281 immediately downstream of SOBIR1. Therefore, we tested whether SOBIR1 directly  
282 interacts with PCRK2 and PBL19 using TurboID, a highly efficient proximity  
283 labeling method for detecting protein-protein interactions<sup>34,41</sup>. The  
284 SOBIR1-HA-TurboID fusion protein was co-expressed with 3×FLAG-tagged PCRK2  
285 or PBL19 in *N. benthamiana*. After biotin treatment, the 3×FLAG-tagged PCRK2 or  
286 PBL19 proteins were immunoprecipitated to examine their biotinylation using

287 Streptavidin-HRP. Both PCRK2 and PBL19 were biotinylated by  
288 SOBIR1-HA-TurboID, suggesting that SOBIR1 directly interacts with PCRK2 and  
289 PBL19 (Figure 4D). These data agree with the general notion of RLCKs acting  
290 immediately downstream of PRRs. We also tested whether SOBIR1 interacts with  
291 EDS1/PAD4/ADR1 using TurboID. However, no biotinylation or  
292 co-immunoprecipitation of EDS1, PAD4 or ADR1 by SOBIR1-HA-TurboID was  
293 observed (Figure S6).

294

## 295 **Discussion**

296

297 PTI and ETI have been traditionally studied as separate defense pathways. Recently it  
298 was reported that PTI is required for the activation of NLR-mediated ETI<sup>42,43</sup>. Here,  
299 we showed that loss of TIR signaling as well as reduced NLR accumulation results in  
300 compromised defense responses activated by nlp20, flg22 and *Pto* DC3000 *hrcC*,  
301 indicating that activation of TIR signaling is essential for PTI. While the  
302 EDS1/PAD4/ADR1s module plays a predominant role, the EDS1/SAG101/NRG1  
303 module also contributes to flg22, nlp20 and *Pto* DC3000 *hrcC*-induced plant  
304 immunity.

305

306 SA plays crucial roles in resistance against biotrophic pathogens such as *Hpa* Noco2  
307 and *Pto* DC3000. Activation of PTI leads to rapid increase of SA biosynthesis and  
308 elevated SA levels<sup>9</sup>. In the *SNIPER1* overexpression lines, SA levels following nlp20  
309 treatment and *Pto* DC3000 *hrcC* infection are much lower compared to the WT plants.  
310 Similarly, nlp20 and *Pto* DC3000 *hrcC*-induced SA accumulation is greatly reduced  
311 in *eds1-24*, *pad4-1* and *adr1 triple* mutant plants. In *nrg1 triple* and *sag101-1* mutant  
312 plants, SA levels after nlp20 treatment and *Pto* DC3000 *hrcC* infection are also  
313 significantly lower than in the wild type. These findings suggest that both the  
314 EDS1/PAD4/ADR1s and EDS1/SAG101/NRG1s modules downstream of TIR-type  
315 receptors contribute to the up-regulation of SA levels, which plays important roles in  
316 defense against pathogens.

317

318 In flg22-treated *adr1 triple* mutant plants, SA levels are significantly reduced  
319 compared to WT<sup>22</sup>. However, other early PTI responses such as ROS production,  
320 MAPK activation and callose deposition induced by flg22 and elf18 are not affected  
321 in the *adr1 triple* mutant, suggesting that TIR signaling mediated by ADR1s is not  
322 required for the induction of all the very early PTI responses<sup>22</sup>. In flg22-treated  
323 *eds1-24*, *pad4-1*, *adr1 triple*, *sag101-1* and *nrg1 triple* mutant plants, flg22-induced  
324 resistance against *Pto* DC3000 is significantly reduced but not completely blocked.  
325 The loss of TIR signaling is likely compensated by other defense pathways  
326 downstream of FLS2, as combining *pad4-1* with the JA biosynthesis mutant *dde2-2*,  
327 the ethylene response mutant *ein2-1* (*ethylene insensitive 2-1*) and the SA biosynthesis  
328 mutant *sid2-2* (*salicylic acid induction deficient 2-2*) leads to a complete loss of  
329 flg22-induced protection against *Pto* DC3000<sup>44</sup>.

330

331 In mock-treated *adr1 triple*, *eds1-24* and *pad4-1* mutants, growth of *Pto* DC3000 is  
332 much higher than in wild type plants. *adr1 triple*, *eds1-24* and *pad4-1* mutant plants  
333 are also more susceptible to *Hpa* Noco2. The general enhanced susceptibility of these  
334 mutants to virulent pathogens could be due to compromised PTI caused by loss of the  
335 reinforcement of defense responses through activation of TIR signaling.

336

337 *SARDI* encodes as a master transcription factor regulating the expression of a large  
338 number of defense regulators as well as genes involved in SA biosynthesis<sup>45</sup>.  
339 Overexpression of *SARDI* leads to increased SA levels and enhanced disease  
340 resistance<sup>29</sup>. In WT plants, the expression of *SARDI* is rapidly and strongly induced  
341 during PTI. Interestingly, the induction of *SARDI* by nlp20, flg22 and *Pto* DC3000  
342 *hrcC* is dramatically reduced in the *SNIPER1* overexpression lines and mutants  
343 deficient in TIR signaling such as *adr1 triple*, *eds1-24* and *pad4-1*, suggesting that the  
344 *SARDI* induction during PTI depends on the activation of TIR signaling, which is  
345 consistent with the reduced SA levels in the *SNIPER1* overexpression lines and TIR  
346 signaling mutants.

347

348 A large number of *TIR* genes including *SNC1* and *LAZ5* are rapidly induced after  
349 treatment with nlp20 or flg22 (Table S1-S3). Overexpression of *SNC1* and *LAZ5* is  
350 known to result in constitutively activated defense responses<sup>46,47</sup>. Similarly,  
351 overexpression of the TIR-X protein encoded by *At2g32140* also leads to constitutive  
352 activation of EDS1 and PAD4-dependent immune responses<sup>48</sup>. In addition,  
353 overexpression of the TIR domains of many TNLs alone is sufficient to activate cell  
354 death in *N. benthamiana*<sup>14,15,49</sup>. Recently, many TIR domains have been shown to  
355 exhibit NADase activity, likely generating signal molecule(s) activating  
356 EDS1-dependent defense responses<sup>14,15</sup>. Induction of the TIR genes during PTI could  
357 lead to increased production of these defense signal molecules and activation of  
358 downstream TIR signaling pathways and increased SA biosynthesis (Figure 4E). In  
359 support of this, transient overexpression of *AT2G32140* and the TNL genes  
360 *At4G11170* and *AT3G04220*, which are up-regulated during PTI, resulted in dramatic  
361 increase in SA accumulation.

362

363 The RLCKs PCRK2 and PBL19 were found to directly interact with SOBIR1. Together  
364 with two other closely related RCLKs PCRK1 and PBL20, they are required for  
365 nlp20-induced resistance against *Hpa Noco2*. In *pcrk1/2 pbl19/20* quadruple mutant  
366 plants, nlp20-induced *SARD1* expression and SA production was blocked. In addition,  
367 the induction of several *TIR* genes by nlp20 is also abolished in the *pcrk1/2 pbl19/20*  
368 mutant. These findings suggest that PCRK1/2 and PBL19/20 function downstream of  
369 the RLP23/SOBIR1 receptor complex to activate the expression of nlp20-responsive  
370 *TIR* genes, leading to activation of TIR signaling and SA biosynthesis (Fig 4E).

371 Interestingly, three other RLCKs, PBL30/31/32, were recently reported to be required  
372 for nlp20-induced ROS and ethylene production and resistance to *Pto DC3000*<sup>50</sup>. It is  
373 possible that different RLCKs activate different downstream components of the RLP  
374 receptor complex, leading to branching of the downstream defense pathways.

375

376 In summary, in addition to effector recognition, some TNLs and TIR-X proteins also

377 play important roles in amplifying PTI responses (Figure 4E). Activation of TIR  
378 signaling during PTI is most likely through the induction of *TIR* genes. How the  
379 expression of the *TIR* genes is activated is currently unclear. As the induction of  
380 several *TIR* genes by nlp20 is blocked by the Ca<sup>2+</sup> channel blocker GdCl<sub>3</sub>, elevation  
381 in cytosolic Ca<sup>2+</sup> levels caused by activation of Ca<sup>2+</sup> channel(s) during PTI may play a  
382 crucial role in *TIR* gene induction (Figure 4E). The identities of the transcription  
383 factors involved in up-regulation of the *TIR* genes and the mechanism of how Ca<sup>2+</sup>  
384 may affect their activities remains to be determined. Whether PCRK1/2 and  
385 PBL19/20 are involved in activation of the Ca<sup>2+</sup> channel(s) also needs to be  
386 determined in the future.

387

## 388 **Materials and methods**

### 389 **Plasmid constructs**

390 To generate the CRISPR/Cas9 construct for genome editing of *EDS1A/B* and *PBL20*,  
391 genomic sequences of *EDS1* and *PBL20* were subjected to CRISPRscan  
392 (<http://www.crisprscan.org/?page=sequence>) to identify the target sequences. The  
393 selected sequences were evaluated with Cas-OFFinder  
394 (<http://www.rgenome.net/cas-offinder/>). The target sequences used for editing  
395 *EDS1A/B* was 5'-CTAACCGAGCGCTATCACA(AGG)-3' and  
396 5'-CGGAGAATACATCTCCCTT(TGG)-3', for *PBL20* was  
397 5'-CCAAAATCCAGAGGAAATA(TGG)-3' and  
398 5'-CAATAAGTATCCAATTGCTA(TGG)-3'. CRISPR constructs were generated in  
399 the *pHEE401E* vector using a previously described CRISPR-Cas9 gene editing  
400 system <sup>51</sup>.

401

402 For coimmunoprecipitation, *PCRK2*, *PBL19* and *ADR1* were amplified by primers  
403 PCRK2-Kpn1-F and PCRK2-Spe1-R, PBL19-Kpn1-F and PBL19-BamH1-R, or  
404 ADR1-KpnI-F and ADR1-SalI-R, then cloned into pBASTA-35S-3FLAG vector. The  
405 *SOBIR1* fragment was cut from pBASTA-35S-SOBIR1-3FLAG plasmid <sup>52</sup>, then  
406 sub-cloned into pBASTA-35S-2HA-Turbo vector. *EDS1* and *PAD4* were first

407 amplified by primers EDS1-KpnI-F and EDS1-XbaI-R or PAD4-Kpn1-F and  
408 PAD4-BamHI-R, and cloned into pCambia1305-FLAG-ZZ vector <sup>53</sup>.

409

#### 410 **Plant materials and growth conditions**

411 The *pad4-1*, *sag101-1*, *adr1 triple*, *nrg1 triple*, and *pcrk1 pcrk2 (pcrk1/2)* double  
412 mutants were previously described <sup>20,22,38,54,55</sup>. The *eds1-24* deletion line was  
413 generated by transformation of a *EDS1* CRISPR construct into WT Col-0 plants.  
414 Deletion and presence primers were used to detect the presence and homozygosity of  
415 the deletion (Supplemental Table 4). The *eds1-24* line is a Cas9 transgene-free line  
416 homozygous for a 2636bp deletion, causing truncations of both *EDS1A (AT3G48090)*  
417 and *EDS1B (AT3G48080)*.

418 The *pcrk1 pcrk2 pbl19 (pcrk1/2 pbl19)* triple mutant was generated by crossing *pcrk1*  
419 *pcrk2* with *pbl19-2* (Salk\_065136C). The *pcrk1 pcrk2 pbl19 pbl20 (pcrk1/2 pbl19/20)*  
420 quadruple mutants were generated by transforming the CRISPR/Cas9 construct  
421 targeting *PBL20* into the *pcrk1 pcrk2 pbl19* triple mutant background. Both *pcrk1*  
422 *pcrk2 pbl19 pbl20* #33 and #47 lines carry a large 1.5 kb deletion in *PBL20*. All the  
423 mutants are in the Col-0 background. The transgenic OX-*SNIPER1* #4, OX-*SNIPER1*  
424 #5 lines were generated previously in a reverse genetics screen for plant immunity  
425 related E3 ligases <sup>20</sup>.

426

427 Plants were grown in growth rooms with a temperature of 23°C under long day (16h  
428 light/8h dark) or short day (12h light/12h dark) condition at approximately 100  $\mu\text{mol}$   
429  $\text{m}^{-2} \text{s}^{-1}$  light intensity. For *Agrobacterium* mediated transformation, the *Arabidopsis*  
430 seeds were directly sown on soil and grown for around 5 weeks prior to floral-dip  
431 transformation. For RNA isolation, the *Arabidopsis* seeds were sterilized in 15% (v/v)  
432 bleach and germinated on plates with ½ Murashige and Skoog (MS) with vitamins  
433 (PlantMedia) and 1% (w/v) sucrose.

434

#### 435 **RNA extraction and gene expression**

436 For analyzing nlp20/flg22 induced gene expression, total RNA was extracted from  
437 12-day-old plate-grown seedlings 4 hours after spraying 1  $\mu$ M flg22 or 1  $\mu$ M nlp20. To  
438 test pathogen-induced gene expression, leaves of four-week-old plants grown under  
439 short day conditions were infiltrated with *Pto* DC3000 *hrcC* at a dose of OD<sub>600</sub>=0.05  
440 and collected after 12 hours. RNA was extracted using the EZ-10 Spin Column Plant  
441 RNA Mini-Preps Kit (Bio Basic, Canada) according to the manufacturer's instructions.  
442 1  $\mu$ g RNA was used for cDNA synthesis by Oligo(dT)-primed reverse transcription  
443 using the OneScript Reverse Transcriptase kit (ABM, Canada). Real-time quantitative  
444 PCR was performed to analyze the gene expression levels, using the SYBR Premix  
445 Ex Taq II kit (TAKARA). The primers used for qPCR were reported previously<sup>45</sup>.  
446 *ACTIN1* was used as an internal control. For nlp20-induced *TIR* gene expression  
447 analysis, 10-day-old seedlings grown on 1/2 MS medium were transferred to 1/2 MS  
448 liquid medium. After 24-hour recovery, nlp20 was supplied to a 1  $\mu$ M final  
449 concentration. Two to three individual plants treated with nlp20 were harvested 1 hour  
450 later as one sample. *ACTIN7* was used as an internal control. The primers used are  
451 listed in Supplemental Table 4.

452

### 453 **Measurement of Salicylic acid**

454 The procedure for SA extraction and measurement was reported previously<sup>56</sup>. In brief,  
455 for each sample, about 100mg leaf tissue was collected from 25-d-old soil-grown  
456 plants and grounded in liquid nitrogen. Each genotype contains four biological  
457 replicates, with each sample collected from three different plants. For every sample,  
458 0.6 ml of 90% methanol was added, and the sample was vortexed 20s and sonicated  
459 for 20 min to release SA. Samples were then centrifuged at 12000 $\times$ g for 10 min. The  
460 supernatant was collected and another 0.5 ml of 100% methanol was added to the  
461 pellet for a second round of extraction. The supernatant from both extractions were  
462 combined and dried by vacuum. Then 0.5 ml 5% (w/v) trichloroacetic acid was added  
463 to the dry samples, vortexed and sonicated for 5 min, and then centrifuged at 12000 $\times$ g  
464 for 15 min. The supernatant was collected and then extracted three times with 0.5 ml  
465 extraction buffer (ethylacetate acid/ cyclopentane/ isopropylal: 100/99/1 by volume).



466 Each time, after centrifugation at 12,000×g for 10 min, the organic phase was  
467 collected and combined to a new tube and dried by vacuum afterwards. The final  
468 dried sample was resuspended in 200 µl mobile phase (0.2M KAc, 0.5mM EDTA  
469 PH=5) by vortexing and sonicating for 5 min. After spinning at 12,000×g for 5 min,  
470 the supernatant was kept and measured by high-performance liquid chromatography  
471 (HPLC) to measure the amount of SA as compared with a standard.

472

### 473 **Pathogen infection assay**

474 For *Pto* DC3000 *hrcC* bacterial growth assays, two fully extended leaves of  
475 four-week-old plants grown under short-day conditions were infiltrated with *Pto*  
476 DC3000 *hrcC* at a dose of OD<sub>600</sub> =0.002. Samples were collected at 0 day and 3 days  
477 after infiltration. One sample contained two leaf discs from a single plant, and a single  
478 leaf disc was collected from each infected leaf. The samples were ground, diluted in  
479 10 mM MgCl<sub>2</sub>, and plated on Lysogeny broth (LB) agar plates containing 25 µg ml<sup>-1</sup>  
480 Rifampicin. After incubation at 28°C for 36 h, colonies were counted from selected  
481 dilutions and the colony numbers were used to calculate the colony forming units. For  
482 flg22/nlp20-induced pathogen resistance, leaves of four-week-old plants were  
483 infiltrated with 1 µM flg22/nlp20 or H<sub>2</sub>O as control. After 24h, the same treated  
484 leaves were infiltrated with *Pto* DC3000 at a dose of OD<sub>600</sub>=0.001. After 3 days,  
485 samples were collected and analyzed as above.

486

487 To analyze nlp20-induced SAR, leaves of three-week-old plants were first infiltrated  
488 with 1 µM nlp20. After 24 h, plants were sprayed with *Hpa* Noco2 spore suspension  
489 at a concentration of 50,000 per ml water. Then plants were covered with a clean  
490 dome and grown at 18°C under short-day conditions in a growth chamber. After 7  
491 days, the *Hpa* Noco2 sporulation was scored as previously described<sup>57</sup>.

492

493 **TurboID-based proximity labeling in *N. benthamiana*, immunoprecipitation and**  
494 **western blot analysis**

495 TurboID-based proximity labeling assay was performed as described previously<sup>20</sup>. In  
496 brief, *N. benthamiana* leaves were infiltrated with *Agrobacterium* containing  
497 *HA-TurboID* and *ZZ-TEV-FLAG* or *3xFLAG* tagged constructs. At 48 hpi, biotin was  
498 infiltrated, and the plants were incubated at room temperature for 2 hours to allow  
499 biotin labeling. About 2.0 g *N. benthamiana* leaves expressing the indicated proteins  
500 were harvested at 50 hpi and ground into powder with liquid nitrogen. Extraction  
501 buffer containing 25 mM Tris-HCl pH 7.5, 150 mM NaCl, 1mM EDTA, 0.3%  
502 Nonidet P-40, 10% Glycerol, 1 mM PMSF, 1× Protease Inhibitor Cocktail (Roche;  
503 Cat. #11873580001), and 10 mM DTT. The FLAG-tagged PCRK2 and PBL19  
504 proteins were immunoprecipitated using 15 µl M2 beads (Sigma; Cat. #A2220).  
505 Biotinylation was detected with Streptavidin-HRP (Abcam Cat. # ab7403). The  
506 anti-HA antibody was from Roche (Cat. #11867423001). The anti-FLAG antibody  
507 was from Sigma (Cat. #F1804).

#### 508 **Bioinformatic analysis for TIR-containing gene induction**

509 TIR genes induced 30 minutes after flg22 treatment were subset from previously  
510 published data<sup>58</sup>. For nlp20-induced genes, previously published raw RNA-seq reads  
511 were retrieved (GSE133053)<sup>36</sup>. BBDuk (<https://sourceforge.net/projects/bbmap/>) was  
512 used to trim adapters. A decoy-aware reference transcriptome was generated using a  
513 high-quality *Arabidopsis* reference transcriptome, AtRTDv2\_QUASI\_19April2016.fa  
514<sup>59</sup>, and an *Arabidopsis* whole genome sequence (Ensembl Plants version 47) as a  
515 decoy. Salmon v1.2.1<sup>60</sup> was used to build an index and quantify transcript expression  
516 against the reference transcriptome using default parameters. Transcript-level  
517 expression (TPM values) were imported to R and summarized to gene-level  
518 expression using tximport v1.16.1<sup>61</sup>. DESeq2 v1.28.1<sup>62</sup> was used to determine  
519 differentially-expressed genes (padj < 0.1). Genes were annotated using biomaRt  
520 v2.44.1<sup>63</sup>, and genes containing TIR domains (IPR035897, IPR000157, IPR041340,  
521 IPR017279) were subset.

522

#### 523 **Author Contributions**

524 HT, SC and ZW carried out the majority of the experiments. KA generated *eds1-24*,  
525 and extracted the up-regulated *TIR* genes from RNA-Sequencing datasets. WH and  
526 YZ helped with HPLC SA analysis. FX made the FLAG-ZZ tagged EDS1 and PAD4  
527 constructs. HY and TS generated the combined RLCK mutants. YZ, SW and XL  
528 wrote the manuscript with contributions of all authors.

529

### 530 **Competing financial interests**

531 The authors declare no competing financial interests.

532

### 533 **Acknowledgements**

534 We would like to thank Drs. Jane Parker, Jeff Dangl and Jian-Min Zhou for sharing  
535 mutant seeds and pathogen strains. Mr. Lei Tian is thanked for help with the HPLC  
536 analysis. Dr. Thorsten Nuernberger is thanked for insightful discussions. This study  
537 was financially supported by grants to XL and YZ from the Natural Sciences and  
538 Engineering Research Council (NSERC) Discovery program of Canada,  
539 NSERC-CREATE-PRoTECT, and the Canadian Foundation for Innovation (CFI),  
540 grant to YZ from National Natural Science Foundation of China (31828008),  
541 scholarships to HT, SC, WH and ZW from the Chinese Scholarship Council, and  
542 scholarships to KA from the Alexander Graham Bell Canada Graduate Scholarship  
543 Doctoral Program, and the University of British Columbia Four-year fellowship  
544 program.

545

546

547 **Figure legends:**

548

549 **Figure 1. Overexpression of *SNIPER1* leads to attenuation of *Pto* DC3000 *hrcC*,**  
550 ***flg22* and *nlp20*-induced immunity.**

551 (A) Growth of *Pto* DC3000 *hrcC* in wild type (WT) Col-0 and two independent  
552 *SNIPER1* overexpression (OX-*SNIPER1*) lines. Leaf discs were collected 0 days (Day  
553 0) or 3 days (Day 3) after bacterial infiltration (OD<sub>600</sub>=0.002). Error bars represent  
554 standard deviation (SD) from four biological replicates. The growth of *Pto* DC3000  
555 *hrcC* in different genotypes on Day 3 was compared using two-way ANOVA test, and  
556 different letters indicate genotypes with statistical differences ( $p < 0.05$ ;  $n = 4$ ). The  
557 experiment was repeated twice with similar results.

558 (B, C) Relative expression levels of *SARD1* (B) and *FMO1* (C) in WT and  
559 OX-*SNIPER1* plants upon *Pto* DC3000 *hrcC* infection. Total RNA was isolated from  
560 leaf tissues of 25-d-old soil-grown plants 12 hours after infiltration with *Pto* DC3000  
561 *hrcC* (OD<sub>600</sub>=0.05) or 10 mM MgCl<sub>2</sub> (Mock). qPCR was used to examine the genes  
562 expression levels. *ACT1* was used for normalization, and the expression of each gene  
563 in mock-treated WT plants was set as 1. Error bars represent SD from three different  
564 biological replicates. Different letters indicate genotypes with statistical differences ( $p$   
565  $< 0.05$ , one-way ANOVA test;  $n=3$ ). The experiment was repeated twice with similar  
566 results.

567 (D) Free salicylic acid (SA) levels in four-week-old WT and OX-*SNIPER1* plants 12  
568 hours after treatment with 10 mM MgCl<sub>2</sub> (mock) or *Pto* DC3000 *hrcC*. Different  
569 letters indicate genotypes with statistical differences ( $p < 0.05$ , one-way ANOVA test;  
570  $n=3$ ). The experiment was repeated three times with similar results.

571 (E, F) Relative expression levels of *SARD1* and *FMO1* in WT and OX-*SNIPER1*  
572 plants upon 1  $\mu$ M *nlp20* (E) or 1  $\mu$ M *flg22* (F) treatment. Total RNA was isolated  
573 from 12-d-old plate-grown seedlings 4 hours after spraying with 1  $\mu$ M *nlp20* (A) or 1  
574  $\mu$ M *flg22* (B). *ACT1* was used for normalization, and the expression of each gene in  
575 the H<sub>2</sub>O (mock)-treated WT plants was set as 1. Error bars represent SD from three

576 different biological replicates. Different letters indicate genotypes with statistical  
577 differences ( $p < 0.05$ , one-way ANOVA test;  $n=3$ ). The experiment was repeated twice  
578 with similar results.

579 (G, H) Levels of free SA in WT and OX-*SNIPER1* plants upon 1  $\mu$ M nlp20 (G) or 1  
580  $\mu$ M flg22 (H) treatment. 25-d-old soil-grown plants samples were collected 24 hours  
581 after treatment with nlp20, and 9 hours after treatment with flg22. H<sub>2</sub>O served as  
582 mock treatment. Different letters indicate genotypes with statistical differences ( $p <$   
583  $0.05$ , one-way ANOVA test;  $n=3$ ). The experiment was repeated three times with  
584 similar results.

585 (I) Growth of *Hpa Noco2* on the local leaves of WT and OX-*SNIPER1* plants with or  
586 without nlp20 treatment. Three-week-old plants were pretreated with water (H<sub>2</sub>O) or  
587 1  $\mu$ M nlp20 and sprayed with *Hpa Noco2* spores (50,000 spores/ml) 24 hours later.  
588 Infection was scored at 7 days post inoculation (dpi) by counting the number of  
589 conidiophores per infected leaf. A total of 15 plants were scored for each treatment.  
590 Disease rating scores are as follows: 0, no conidiophores on the infected leaves; 1, no  
591 more than 5 conidiophores on one infected leaf; 2, 6 to 20 conidiophores on one  
592 infected leaf; 3, 20 or more conidiophores on one infected leaf; 4, 5 or more  
593 conidiophores on two infected leaves; 5, 20 or more conidiophores on two infected  
594 leaves. This experiment was repeated twice with similar results.

595 (J) Growth of *Hpa Noco2* on the distal leaves of WT and OX-*SNIPER1* plants in an  
596 SAR assay. 15 plants were used for each treatment. Disease symptoms were scored 7  
597 dpi by counting the number of conidiophores on the distal leaves. Disease ratings: 0,  
598 no conidiophores on plants; 1, one leaf is infected with no more than five  
599 conidiophores; 2, one leaf is infected with more than five conidiophores; 3, two leaves  
600 are infected but with no more than five conidiophores on each infected leaf; 4, two  
601 leaves are infected with more than five conidiophores on each infected leaf; 5, more  
602 than two leaves are infected with more than five conidiophores.

603 The experiment was repeated twice with similar results.

604

605 **Figure 2. Contributions of TIR signaling components to *Pto* DC3000 *hrcC*, flg22**

606 **and nlp20-induced immunity.**

607 (A) Levels of free SA in four-week-old soil-grown WT, *eds1-24*, *pad4-1*, *sag101-1*,  
608 *adr1 triple* and *nrg1 triple* mutants 12 hours after treatment with 10 mM MgCl<sub>2</sub> or  
609 *Pto* DC3000 *hrcC* (OD<sub>600</sub>=0.05) for 12 hours. Different letters indicate genotypes  
610 with statistical differences ( $p < 0.05$ , one-way ANOVA test;  $n=3$ ). The experiment was  
611 repeated three times with similar results.

612 (B) Growth of *Pto*DC3000 *hrcC* in 25-day-old soil-grown plants of the indicated  
613 genotypes. Leaf discs were collected 0 days (Day 0) or 3 days (Day 3) after *Pto*  
614 DC3000 *hrcC* (OD<sub>600</sub>=0.002) infiltration. Error bars represent SD from four  
615 biological replicates. The growth of *Pto* DC3000 *hrcC* in different genotypes was  
616 compared using two-way ANOVA test, and different letters indicate genotypes with  
617 statistical differences ( $p < 0.05$ ,  $n = 4$ ). The experiment was repeated twice with  
618 similar results.

619 (C) Levels of free SA in four-week-old soil-grown plants of the indicated genotypes  
620 after treatment with water or 1  $\mu$ M flg22 for 9 hours. Different letters indicate  
621 genotypes with statistical differences ( $p < 0.05$ , one-way ANOVA test;  $n=3$ ). The  
622 experiment was repeated three times with similar results.

623 (D) Growth of *Pto* DC3000 in the leaves of four-week-old WT, *eds1-24*, *pad4-1*,  
624 *sag101-1*, *adr1 triple* and *nrg1 triple* mutant plants after treatment with water or 1  $\mu$ M  
625 flg22. 24 hours later, the same treated leaves were infiltrated with *Pto* DC3000.  
626 Samples were taken 3 days after *Pto* DC3000 inoculation. Error bars represent SD  
627 from six biological replicates. The flg22-induced protection among different  
628 genotypes was compared using two-way ANOVA test, and different letters indicate  
629 genotypes with statistical differences ( $p < 0.05$ ,  $n= 6$ ). The experiment was repeated  
630 twice with similar results.

631 (E) Levels of free SA in four-week-old soil-grown plants of the indicated genotypes  
632 after treatment with water (mock) or 1  $\mu$ M nlp20 for 24h. Different letters indicate  
633 genotypes with statistical differences ( $p < 0.05$ , one-way ANOVA test;  $n=3$ ). The  
634 experiment was repeated three times with similar results.

635 (F) Growth of *Hpa* Noco2 on the local leaves of the indicated plants. Three-week-old

636 soil-grown plants were pretreated with water or 1  $\mu$ M nlp20 and sprayed with *Hpa*  
637 *Noco2* spores (50,000 spores/ml) 24 hours later. Disease ratings are as described in  
638 Fig 1. The experiment was repeated twice with similar results.

639

640 **Figure 3. Overexpression of *TIR* genes activates SA biosynthesis in *N.***

641 *benthamiana*.

642 (A) Hypersensitive response (HR) in the *N. benthamiana* leaves expressing the *TIR*  
643 genes *At4g11170*, *At3g04220* or *At2g32140* through *Agrobacterium tumefaciens*  
644 GV3101 ( $OD_{600}=0.4$ ) infiltration. Photographs were taken 3 days after *Agrobacterium*  
645 infiltration. The empty vector (EV) treatment serves as control; 1, *At4g11170*; 2,  
646 *At3g04220*; 3, *At2g32140*.

647 (B) Levels of free SA in *N. benthamiana* leaves after infiltration of *Agrobacterium*  
648 ( $OD_{600}=0.4$ ) carrying the *TIR* genes from (A). Samples were collected 24 and 36  
649 hours post infiltration, before HR was visible. Error bars represent SD from three  
650 biological replicates. Different letters indicate different time course with statistical  
651 differences ( $p < 0.05$ , one-way ANOVA test;  $n=3$ ).

652 (C, D) Induction of the indicated *TIR* genes by nlp20 (C) or flg22 (D). Ten-day--old  
653 plate-grown WT plants were transplanted to water 1 day before for recovery and then  
654 pretreated with water (Mock) or 100  $\mu$ M  $GdCl_3$  for 1 hour. Samples were collected 1  
655 hour after supplying with 1  $\mu$ M nlp20 or 1  $\mu$ M flg22. qPCR was used to examine the  
656 genes expression level. *ACT7* was used for normalization. Error bars represent SD  
657 from three different biological replicates. Different letters indicate different treatment  
658 with statistical differences ( $p < 0.05$ , one-way ANOVA test;  $n=3$ )

659 All the experiments were repeated twice with similar results.

660

661 **Figure 4. PCRK1/2 and PBL19/20 are required for nlp20-induced immunity.**

662 (A) Growth of *Hpa Noco2* on the distal leaves of WT, *pcrk1/2*, *pcrk1/2 pbl19*, *pcrk1/2*  
663 *pbl19/20* #33 and *pcrk1/2 pbl19/20* #47 quadruple mutant plants. 21-d-old soil-grown  
664 plants were treated with 1  $\mu$ M nlp20 and sprayed *Hpa Noco2* spores (50,000  
665 spores/ml) 24 hours later. The detail method was described in Fig 2F.

666 (B) Levels of free SA in four-week-old soil-grown plants of the indicated genotypes  
667 treated with water or 1  $\mu$ M nlp20. Samples were collected 24 hours post elicitor  
668 treatment. Different letters indicate genotypes with statistical differences ( $p < 0.05$ ,  
669 one-way ANOVA test; n=3).

670 (C) The induction of *At4g11170*, *At3g04220* and *At2g32140* (*TIR* genes) in the  
671 indicated genotypes. Total RNA was isolated from seedlings of 10-d-old plate-grown  
672 plants 1 h after treatment with 1  $\mu$ M nlp20. *ACT7* was used for normalization, and the  
673 expression of each gene in mock-treated WT was set as 1. Error bars represent SD  
674 from three different biological replicates. Different letters indicate genotypes with  
675 statistical differences ( $p < 0.05$ , one-way ANOVA test; n=3).

676 (D) Immunoprecipitation and biotinylation of *PCRK2/PBL19-3FLAG* by  
677 *SOBIR1-HATurboID* in *N. benthamiana*. *Agrobacterium* carrying the indicated  
678 constructs were infiltrated into *N. benthamiana* leaves for protein expression.  
679 Immunoprecipitation was carried out with anti-FLAG beads. The 3FLAG-tagged  
680 proteins were detected using an anti-FLAG antibody. The biotinylated proteins were  
681 detected using HRP-Streptavidin. The experiments in (A-D) were repeated twice with  
682 similar results.

683 (E) A working model for the contribution of TIR signaling in PTI. Upon perception of  
684 pathogen elicitors such as flg22 and nlp20, PRRs activate early immune responses  
685 such as ROS production, MAPK activation and  $Ca^{2+}$  influx through RLCKs. Elevated  
686 cytosolic  $Ca^{2+}$  levels induce the expression of a large number of *TIR* genes, leading to  
687 activation of downstream defense pathways through the EDS1/PAD4/ADR1s and  
688 EDS1/SAG101/NRG1s signaling modules. Activation of TIR signaling further  
689 induces downstream defense gene expression, resulting in increased SA biosynthesis  
690 and enhanced resistance to pathogens. In parallel, activation of MAPKs promotes the  
691 biosynthesis of ethylene.

692

693



694 **Supplementary tables:**

695

696 **Table S1: TIR genes induced by flg22 30 min after treatment.**

697

698 **Table S2: TIR genes induced by nlp20 1h after treatment.**

699

700 **Table S3: TIR genes induced by nlp20 6h after treatment.**

701

702 **Table S4: Sequence of primers used in this study.**

703

704

705

706 **Supplementary figure legends:**

707

708 **Figure S1. Levels of glucose-conjugated SA (SAG) in WT and OX-SNIPER1**  
709 **plants.**

710 (A) SAG levels in four-week-old soil-grown WT and OX-SNIPER1 plants treated  
711 with 10 mM MgCl<sub>2</sub> (mock) or *Pto* DC3000 *hrcC*.

712 (B, C) SAG levels in 25-d-old plants WT and OX-SNIPER1 plants treated with H<sub>2</sub>O  
713 (mock), 1 μM nlp20 (B) or 1 μM flg22 (C).

714 Samples were collected for SAG measurement 24 hr after 1 μM nlp20, or 9 hr after  
715 1 μM flg22 treatment. Different letters indicate genotypes with statistical differences  
716 ( $p < 0.05$ , one-way ANOVA test; n=3). All the experiments were repeated three times  
717 with similar results.

718

719 **Figure S2. Induction of SARD1 and FMO1 gene expression and SAG production**  
720 **in TIR signaling mutants upon *Pto* DC3000 *hrcC*, flg22 or nlp20 treatment.**

721 (A, B) Relative expression levels of *SARD1* (A) and *FMO1* (B) in WT, *eds1-24*,  
722 *pad4-1*, *sag101-1*, *adr1 adr-L1 adr-L2 (adr1 triple)* and *nrg1a nrg1b nrg1c (nrg1*  
723 *triple)* mutant plants after treatment with *Pto* DC3000 *hrcC* (OD<sub>600</sub> = 0.05) for 12  
724 hours. Error bars represent SD from three different biological replicates. Different  
725 letters indicate genotypes with statistical differences ( $p < 0.05$ , one-way ANOVA test;  
726 n=3).

727 (C, F, I) Four-week-old soil-grown plants of the indicated genotypes were treated with  
728 *Pto* DC3000 *hrcC* (OD<sub>600</sub>=0.05) (D), 1 μM flg22 (F) or 1 μM nlp20 (I). Samples were  
729 collected for SAG measurement 12 hr after inoculation of *Pto* DC3000 *hrcC*, 24 hr  
730 after treatment with 1 μM nlp20, or 9 hr after treatment with 1 μM flg22. Different  
731 letters indicate genotypes with statistical differences ( $p < 0.05$ , one-way ANOVA test;  
732 n=3). The experiment was repeated three times with similar results.

733 (D, E) Relative expression levels of *SARD1* (D) and *FMO1* (E) in the indicated  
734 genotypes upon flg22 treatment. Total RNA was isolated from 12-d-old plate-grown  
735 seedlings 4 h after spraying with 1 μM flg22. Different letters indicate genotypes with

736 statistical differences ( $p < 0.05$ , one-way ANOVA test;  $n=3$ ).

737 (G, H) Relative expression levels of *SARD1* (G) and *FMO1* (H) in the indicated  
738 genotypes upon nlp20 treatment. Total RNA was isolated from 12-d-old plate-grown  
739 seedlings 4 h after spraying with 1  $\mu$ M nlp20. Different letters indicate genotypes with  
740 statistical differences ( $p < 0.05$ , one-way ANOVA test;  $n=3$ ).

741 For gene expression analysis in (A, B, D, E, G, H), the expression of each gene in the  
742 mock-treated WT plants was set as 1. All gene expression analyses were repeated  
743 twice with similar results.

744

745 **Figure S3. Growth of *Hpa* Noco2 on the distal leaves of TIR signaling mutants.**  
746 **mutants.**

747 Three-week-old soil-grown plants were pretreated with water or 1  $\mu$ M nlp20 and  
748 sprayed with *Hpa* Noco2 spores (50,000 spores/ml) 24 hours later. Disease ratings are  
749 as described in Fig 1. The experiment was repeated twice with similar results.

750

751 **Figure S4. Levels of glucose-conjugated SA (SAG) in *N. benthamiana* leaves after**  
752 **infiltration of *Agrobacterium* carrying the *TIR* genes.**

753 Samples were collected 24 and 36 hours post infiltration of the bacteria ( $OD_{600}=0.4$ )  
754 before HR was visible. Different letters indicate statistical differences ( $p < 0.05$ ,  
755 one-way ANOVA test;  $n=3$ ) compared with the empty vector control. The experiment  
756 was repeated twice with similar results.

757

758 **Figure S5. nlp20-induced immune responses are compromised in *pcrk1/2***  
759 ***pbl19/20* quadruple mutant plants.**

760 (A) Growth of *Hpa* Noco2 on the local leaves of WT, *pcrk1/2*, *pcrk1/2 pbl19*, *pcrk1/2*  
761 *pbl19/20* #33 and *pcrk1/2 pbl19/20* #47 quadruple mutant plants after 1  $\mu$ M nlp20  
762 treatment. Infection was scored 7 dpi by counting the number of conidiophores per  
763 infected leaf. Detailed methodology was described in Fig 2E.

764 (B) Growth of *Pto* DC3000 in the leaves of four-week-old WT, *pcrk1/2 pbl19/20* #33  
765 and *pcrk1/2 pbl19/20* #47 quadruple mutant plants pre-treated with water or 1  $\mu$ M

766 nlp20. 24 hours post elicitor treatment, the treated leaves were infiltrated with *Pto*  
767 DC3000 (OD<sub>600</sub>=0.001). Samples were taken 3 days after *Pto* DC3000 inoculation.  
768 Error bars represent SD from six biological replicates. The nlp20-induced protection  
769 among different genotypes was compared using two-way ANOVA test, and different  
770 letters indicate genotypes with statistical differences ( $p < 0.05$ ,  $n = 6$ ).  
771 (C) Levels of SAG in four-week-old soil-grown plants of the indicated genotypes  
772 treated with water or 1  $\mu$ M nlp20. Samples were collected 24 hours post elicitor  
773 treatment. Different letters indicate statistical differences ( $p < 0.05$ , one-way ANOVA  
774 test;  $n=3$ )  
775 (D, E) Relative expression levels of *SARD1* (D) and *FMO1* (E) in the indicated  
776 genotypes. Total RNA extracted from 12-d-old plate-grown plants treated with 1  $\mu$ M  
777 nlp20 for 4h. *ACT1* was used for normalization, and the expression of each gene in  
778 mock-treated WT was set as 1. Error bars represent SD from three different biological  
779 replicates. Different letters indicate genotypes with statistical differences ( $p < 0.05$ ,  
780 one-way ANOVA test;  $n=3$ ).  
781 All the experiments were repeated twice with similar results.

782

783 **Figure S6. Analysis of interactions between SOBIR1 and EDS1/PAD4/ADR1 by**  
784 **TurboID and co-immunoprecipitation analysis.**

785 *Agrobacterium* carrying the indicated constructs were infiltrated into *N. benthamiana*  
786 leaves for protein expression. Immunoprecipitation of EDS1-FLAG-ZZ,  
787 PAD4-FLAG-ZZ or ADR1-3FLAG was carried out with anti-FLAG beads. The  
788 3FLAG-tagged and HATurboID fusion proteins were detected by western blot using  
789 an anti-FLAG or anti-HA antibody by western blot. The biotinylated proteins were  
790 detected by western blot using HRP-Streptavidin. Molecular mass marker in  
791 kiloDaltons is indicated on the left. The experiment was repeated twice with similar  
792 results.

793

794

795

799 **References:**

800

- 801 1 Zhou, J. M. & Zhang, Y. Plant Immunity: Danger Perception and Signaling. *Cell* **181**, 978-989,  
802 doi:10.1016/j.cell.2020.04.028 (2020).
- 803 2 Jones, J. D. & Dangl, J. L. The plant immune system. *Nature* **444**, 323-329 (2006).
- 804 3 Monaghan, J. & Zipfel, C. Plant pattern recognition receptor complexes at the plasma  
805 membrane. *Curr Opin Plant Biol* **15**, 349-357, doi:10.1016/j.pbi.2012.05.006 (2012).
- 806 4 Liebrand, T. W., van den Burg, H. A. & Joosten, M. H. Two for all: receptor-associated kinases  
807 SOBIR1 and BAK1. *Trends Plant Sci* **19**, 123-132, doi:10.1016/j.tplants.2013.10.003 (2014).
- 808 5 Gomez-Gomez, L. & Boller, T. FLS2: an LRR receptor-like kinase involved in the perception of  
809 the bacterial elicitor flagellin in Arabidopsis. *Mol Cell* **5**, 1003-1011 (2000).
- 810 6 Felix, G., Duran, J. D., Volko, S. & Boller, T. Plants have a sensitive perception system for the  
811 most conserved domain of bacterial flagellin. *The Plant Journal* **18**, 265-276 (1999).
- 812 7 Böhm, H. *et al.* A conserved peptide pattern from a widespread microbial virulence factor  
813 triggers pattern-induced immunity in Arabidopsis. *PLoS Pathog* **10**, e1004491 (2014).
- 814 8 Albert, I. *et al.* An RLP23–SOBIR1–BAK1 complex mediates NLP-triggered immunity. *Nature*  
815 *Plants* **1**, 1-9 (2015).
- 816 9 Peng, Y., Wersch, R. v. & Zhang, Y. Convergent and divergent signaling in PAMP-triggered  
817 immunity and Effector-triggered immunity. *Molecular Plant-Microbe Interactions* (2017).
- 818 10 Liang, X. & Zhou, J.-M. Receptor-like cytoplasmic kinases: central players in plant receptor  
819 kinase-mediated signaling. *Annual review of plant biology* **69**, 267-299 (2018).
- 820 11 Toruño, T. Y., Stergiopoulos, I. & Coaker, G. Plant-pathogen effectors: cellular probes  
821 interfering with plant defenses in spatial and temporal manners. *Annual review of*  
822 *phytopathology* **54**, 419-441 (2016).
- 823 12 Li, X., Kapos, P. & Zhang, Y. NLRs in plants. *Current opinion in immunology* **32**, 114-121,  
824 doi:10.1016/j.coi.2015.01.014 (2015).
- 825 13 Wang, J. *et al.* Reconstitution and structure of a plant NLR resistosome conferring immunity.  
826 *Science* **364** (2019).
- 827 14 Wan, L. *et al.* TIR domains of plant immune receptors are NAD<sup>+</sup>-cleaving enzymes that  
828 promote cell death. *Science* **365**, 799-803 (2019).
- 829 15 Horsefield, S. *et al.* NAD<sup>+</sup> cleavage activity by animal and plant TIR domains in cell death  
830 pathways. *Science* **365**, 793-799 (2019).
- 831 16 Peart, J. R., Mestre, P., Lu, R., Malcuit, I. & Baulcombe, D. C. NRG1, a CC-NB-LRR protein,  
832 together with N, a TIR-NB-LRR protein, mediates resistance against tobacco mosaic virus. *Curr*  
833 *Biol* **15**, 968-973, doi:10.1016/j.cub.2005.04.053 (2005).
- 834 17 Qi, T. *et al.* NRG1 functions downstream of EDS1 to regulate TIR-NLR-mediated plant  
835 immunity in *Nicotiana benthamiana*. *Proceedings of the National Academy of Sciences* **115**,  
836 E10979-E10987 (2018).
- 837 18 Lapin, D. *et al.* A coevolved EDS1-SAG101-NRG1 module mediates cell death signaling by  
838 TIR-domain immune receptors. *The Plant cell* **31**, 2430-2455 (2019).
- 839 19 Castel, B. *et al.* Diverse NLR immune receptors activate defence via the RPW 8 - NLR NRG 1.  
840 *New Phytologist* **222**, 966-980 (2019).
- 841 20 Wu, Z. *et al.* Differential regulation of TNL - mediated immune signaling by redundant helper

- 842 CNLs. *New Phytologist* **222**, 938-953 (2019).
- 843 21 Dong, O. X. *et al.* TNL - mediated immunity in Arabidopsis requires complex regulation of the  
844 redundant ADR1 gene family. *New Phytologist* (2016).
- 845 22 Bonardi, V. *et al.* Expanded functions for a family of plant intracellular immune receptors  
846 beyond specific recognition of pathogen effectors. *Proc Natl Acad Sci U S A* **108**,  
847 16463-16468, doi:10.1073/pnas.1113726108 (2011).
- 848 23 Wiermer, M., Feys, B. J. & Parker, J. E. Plant immunity: the EDS1 regulatory node. *Curr Opin*  
849 *Plant Biol* **8**, 383-389, doi:10.1016/j.pbi.2005.05.010 (2005).
- 850 24 Liu, Y. *et al.* Diverse roles of the salicylic acid receptors NPR1 and NPR3/NPR4 in plant  
851 immunity. *The Plant cell* **32**, 4002-4016 (2020).
- 852 25 Zhang, Y. & Li, X. Salicylic acid: biosynthesis, perception, and contributions to plant immunity.  
853 *Curr Opin Plant Biol* **50**, 29-36, doi:10.1016/j.pbi.2019.02.004 (2019).
- 854 26 Wildermuth, M. C., Dewdney, J., Wu, G. & Ausubel, F. M. Isochorismate synthase is required  
855 to synthesize salicylic acid for plant defence. *Nature* **414**, 562-565 (2001).
- 856 27 Torrens-Spence, M. P. *et al.* PBS3 and EPS1 complete salicylic acid biosynthesis from  
857 isochorismate in Arabidopsis. *Molecular plant* **12**, 1577-1586 (2019).
- 858 28 Rekhter, D. *et al.* Isochorismate-derived biosynthesis of the plant stress hormone salicylic  
859 acid. *Science* **365**, 498-502, doi:10.1126/science.aaw1720 (2019).
- 860 29 Zhang, Y. *et al.* Control of salicylic acid synthesis and systemic acquired resistance by two  
861 members of a plant-specific family of transcription factors. *Proc Natl Acad Sci U S A* **107**,  
862 18220-18225 (2010).
- 863 30 Wang, L. *et al.* CBP60g and SARD1 play partially redundant critical roles in salicylic acid  
864 signaling. *Plant J* **67**, 1029-1041, doi:10.1111/j.1365-313X.2011.04655.x (2011).
- 865 31 Cheng, Y. T. *et al.* Stability of plant immune-receptor resistance proteins is controlled by  
866 SKP1-CULLIN1-F-box (SCF)-mediated protein degradation. *Proc Natl Acad Sci U S A* **108**,  
867 14694-14699, doi:1105685108 [pii]10.1073/pnas.1105685108 (2011).
- 868 32 Liu, J. *et al.* The malectin-like receptor-like kinase LETUM1 modulates NLR protein SUMM2  
869 activation via MEKK2 scaffolding. *Nature Plants* **6**, 1106-1115 (2020).
- 870 33 Dong, O. X. *et al.* Individual components of paired typical NLR immune receptors are  
871 regulated by distinct E3 ligases. *Nature plants* **4**, 699-710 (2018).
- 872 34 Zhang, Y. *et al.* TurboID-based proximity labeling reveals that UBR7 is a regulator of N NLR  
873 immune receptor-mediated immunity. *Nature communications* **10**, 1-17 (2019).
- 874 35 Wu, Z. *et al.* Plant E3 ligases SNIPER 1 and SNIPER 2 broadly regulate the homeostasis of  
875 sensor NLR immune receptors. *The EMBO journal* **39**, e104915 (2020).
- 876 36 Wan, W. L. *et al.* Comparing Arabidopsis receptor kinase and receptor protein - mediated  
877 immune signaling reveals BIK1 - dependent differences. *New Phytologist* **221**, 2080-2095  
878 (2019).
- 879 37 Li, F. *et al.* Modulation of RNA polymerase II phosphorylation downstream of pathogen  
880 perception orchestrates plant immunity. *Cell host & microbe* **16**, 748-758 (2014).
- 881 38 Kong, Q. *et al.* Two Redundant Receptor-Like Cytoplasmic Kinases Function Downstream of  
882 Pattern Recognition Receptors to Regulate Activation of SA Biosynthesis. *Plant Physiol* **171**,  
883 1344-1354, doi:10.1104/pp.15.01954 (2016).
- 884 39 Rao, S. *et al.* Roles of receptor-like cytoplasmic kinase VII members in pattern-triggered  
885 immune signaling. *Plant physiology* **177**, 1679-1690 (2018).

- 886 40 Sreekanta, S. *et al.* The receptor-like cytoplasmic kinase PCRK1 contributes to  
887 pattern-triggered immunity against *Pseudomonas syringae* in *Arabidopsis thaliana*. *The New*  
888 *phytologist* **207**, 78-90, doi:10.1111/nph.13345 (2015).
- 889 41 Branon, T. C. *et al.* Efficient proximity labeling in living cells and organisms with TurboID.  
890 *Nature biotechnology* **36**, 880-887 (2018).
- 891 42 Ngou, B. P. M., Ahn, H.-K., Ding, P. & Jones, J. D. Mutual potentiation of plant immunity by  
892 cell-surface and intracellular receptors. *bioRxiv* (2020).
- 893 43 Yuan, M. *et al.* Pattern-recognition receptors are required for NLR-mediated plant immunity.  
894 *bioRxiv* (2020).
- 895 44 Tsuda, K., Sato, M., Stoddard, T., Glazebrook, J. & Katagiri, F. Network properties of robust  
896 immunity in plants. *PLoS Genet* **5**, e1000772 (2009).
- 897 45 Sun, T. *et al.* ChIP-seq reveals broad roles of SARD1 and CBP60g in regulating plant immunity.  
898 *Nature communications* **6**, 10159, doi:10.1038/ncomms10159 (2015).
- 899 46 Palma, K. *et al.* Autoimmunity in *Arabidopsis acd11* Is Mediated by Epigenetic Regulation of  
900 an Immune Receptor. *PLoS pathogens* **6**, doi:ARTN e1001137  
901 DOI 10.1371/journal.ppat.1001137 (2010).
- 902 47 Yi, H. & Richards, E. J. Phenotypic instability of *Arabidopsis* alleles affecting a disease  
903 Resistance gene cluster. *BMC plant biology* **8**, 36 (2008).
- 904 48 Kato, H., Saito, T., Ito, H., Komeda, Y. & Kato, A. Overexpression of the TIR-X gene results in a  
905 dwarf phenotype and activation of defense-related gene expression in *Arabidopsis thaliana*.  
906 *Journal of plant physiology* **171**, 382-388 (2014).
- 907 49 Swiderski, M. R., Birker, D. & Jones, J. D. The TIR domain of TIR-NB-LRR resistance proteins is a  
908 signaling domain involved in cell death induction. *Molecular plant-microbe interactions* **22**,  
909 157-165 (2009).
- 910 50 Pruitt, R. N. *et al.* *Arabidopsis* cell surface LRR immune receptor signaling through the  
911 EDS1-PAD4-ADR1 node. *bioRxiv* (2020).
- 912 51 Wang, Z.-P. *et al.* Egg cell-specific promoter-controlled CRISPR/Cas9 efficiently generates  
913 homozygous mutants for multiple target genes in *Arabidopsis* in a single generation. *Genome*  
914 *biology* **16**, 144 (2015).
- 915 52 Liu, Y., Huang, X., Li, M., He, P. & Zhang, Y. Loss-of-function of *Arabidopsis* receptor-like kinase  
916 BIR1 activates cell death and defense responses mediated by BAK1 and SOBIR1. *The New*  
917 *phytologist* **212**, 637-645, doi:10.1111/nph.14072 (2016).
- 918 53 Xu, F. *et al.* Two N-terminal acetyltransferases antagonistically regulate the stability of a  
919 nod-like receptor in *Arabidopsis*. *Plant Cell* **27**, 1547-1562, doi:10.1105/tpc.15.00173 (2015).
- 920 54 Glazebrook, J., Rogers, E. E. & Ausubel, F. M. Isolation of *Arabidopsis* mutants with enhanced  
921 disease susceptibility by direct screening. *Genetics* **143**, 973-982 (1996).
- 922 55 Feys, B. J. *et al.* *Arabidopsis* SENESCENCE-ASSOCIATED GENE101 stabilizes and signals within  
923 an ENHANCED DISEASE SUSCEPTIBILITY1 complex in plant innate immunity. *Plant Cell* **17**,  
924 2601-2613 (2005).
- 925 56 Li, X., Zhang, Y., Clarke, J. D., Li, Y. & Dong, X. Identification and cloning of a negative regulator  
926 of systemic acquired resistance, SNI1, through a screen for suppressors of npr1-1. *Cell* **98**,  
927 329-339 (1999).
- 928 57 Bi, D., Cheng, Y. T., Li, X. & Zhang, Y. Activation of plant immune responses by a  
929 gain-of-function mutation in an atypical receptor-like kinase. *Plant Physiol* **153**, 1771-1779

930 (2010).  
931 58 Li, L. *et al.* The FLS2-associated kinase BIK1 directly phosphorylates the NADPH oxidase  
932 RbohD to control plant immunity. *Cell Host Microbe* **15**, 329-338,  
933 doi:10.1016/j.chom.2014.02.009 (2014).  
934 59 Zhang, R. *et al.* A high quality Arabidopsis transcriptome for accurate transcript-level analysis  
935 of alternative splicing. *Nucleic acids research* **45**, 5061-5073 (2017).  
936 60 Patro, R., Duggal, G., Love, M. I., Irizarry, R. A. & Kingsford, C. Salmon provides fast and  
937 bias-aware quantification of transcript expression. *Nature methods* **14**, 417-419 (2017).  
938 61 Sonesson, C., Love, M. I. & Robinson, M. D. Differential analyses for RNA-seq: transcript-level  
939 estimates improve gene-level inferences. *F1000Research* **4** (2015).  
940 62 Love, M. I., Huber, W. & Anders, S. Moderated estimation of fold change and dispersion for  
941 RNA-seq data with DESeq2. *Genome biology* **15**, 550 (2014).  
942 63 Durinck, S., Spellman, P. T., Birney, E. & Huber, W. Mapping identifiers for the integration of  
943 genomic datasets with the R/Bioconductor package biomaRt. *Nature protocols* **4**, 1184  
944 (2009).  
945



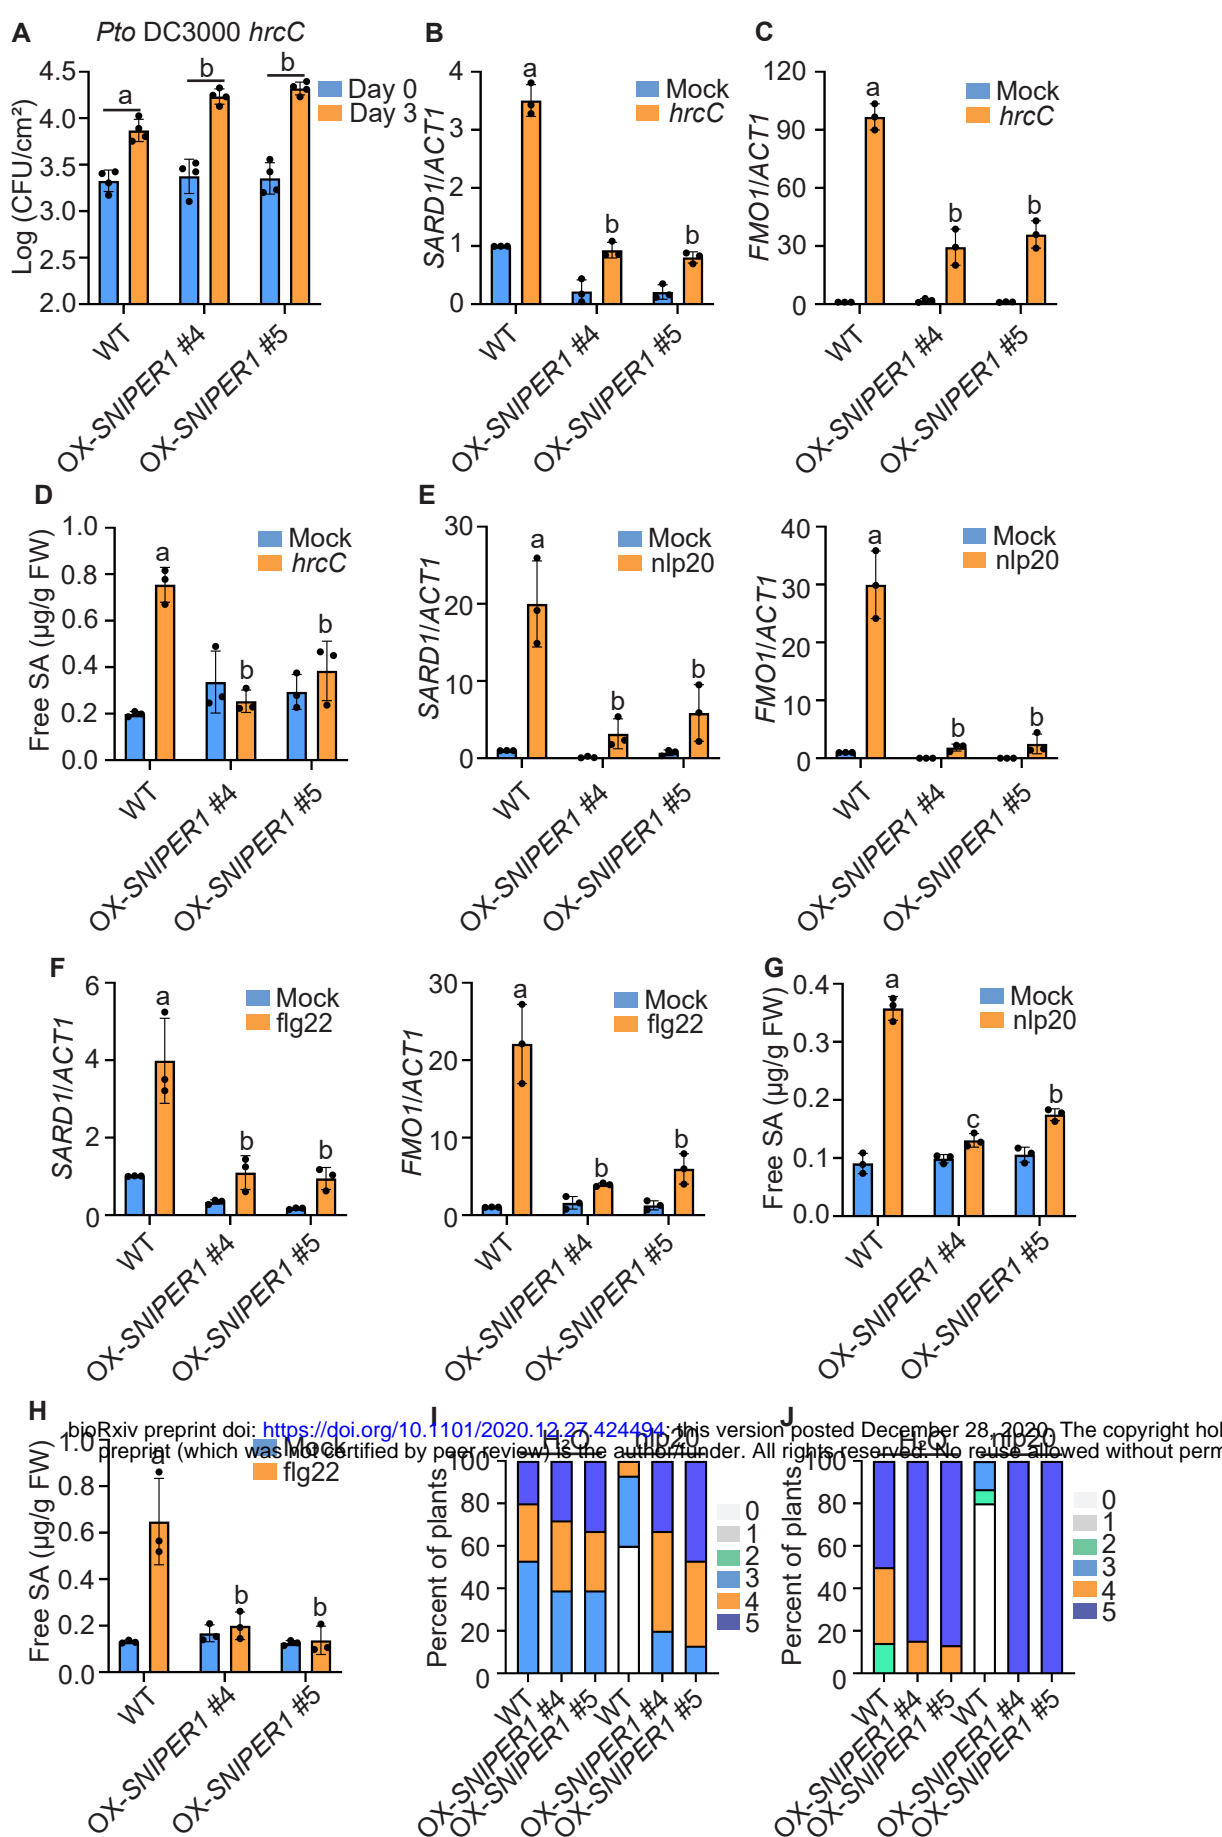

Figure 1. Overexpression of *SNIPER1* leads to attenuation of *Pto* DC3000 *hrcC*, *flg22* and *nlp20*-induced immunity.

(A) Growth of *Pto* DC3000 *hrcC* in wild type (WT) Col-0 and two independent *SNIPER1* overexpression (OX-*SNIPER1*) lines. Leaf discs were collected 0 days (Day 0) or 3 days (Day 3) after bacterial infiltration (OD<sub>600</sub>=0.002). Error bars represent standard deviation (SD) from four biological replicates. The growth of *Pto* DC3000 *hrcC* in different genotypes on Day 3 was compared using two-way ANOVA test, and different letters indicate genotypes with statistical differences ( $p < 0.05$ ;  $n = 4$ ). The experiment was repeated twice with similar results.

(B, C) Relative expression levels of *SARD1* (B) and *FMO1* (C) in WT and OX-*SNIPER1* plants upon *Pto* DC3000 *hrcC* infection. Total RNA was isolated from leaf tissues of 25-d-old soil-grown plants 12 hours after infiltration with *Pto* DC3000 *hrcC* (OD<sub>600</sub>=0.05) or 10 mM MgCl<sub>2</sub> (Mock). qPCR was used to examine the genes expression levels. *ACT1* was used for normalization, and the expression of each gene in mock-treated WT plants was set as 1. Error bars represent SD from three different biological replicates. Different letters indicate genotypes with statistical differences ( $p < 0.05$ , one-way ANOVA test;  $n=3$ ). The experiment was repeated twice with similar results.

(D) Free salicylic acid (SA) levels in four-week-old WT and OX-*SNIPER1* plants 12 hours after treatment with 10 mM MgCl<sub>2</sub> (mock) or *Pto* DC3000 *hrcC*. Different letters indicate genotypes with statistical differences ( $p < 0.05$ , one-way ANOVA test;  $n=3$ ). The experiment was repeated three times with similar results.

(E, F) Relative expression levels of *SARD1* and *FMO1* in WT and OX-*SNIPER1* plants upon 1  $\mu$ M nlp20 (E) or 1  $\mu$ M flg22 (F) treatment. Total RNA was isolated from 12-d-old plate-grown seedlings 4 hours after spraying with 1  $\mu$ M nlp20 (A) or 1  $\mu$ M flg22 (B). *ACT1* was used for normalization, and the expression of each gene in the H<sub>2</sub>O (mock)-treated WT plants was set as 1. Error bars represent SD from three different biological replicates. Different letters indicate genotypes with statistical differences ( $p < 0.05$ , one-way ANOVA test;  $n=3$ ). The experiment was repeated twice with similar results.

(G, H) Levels of free SA in WT and OX-*SNIPER1* plants upon 1  $\mu$ M nlp20 (G) or 1  $\mu$ M flg22 (H) treatment. 25-d-old soil-grown plants samples were collected 24 hours after treatment with nlp20, and 9 hours after treatment with flg22. H<sub>2</sub>O served as mock treatment. Different letters indicate genotypes with statistical differences ( $p < 0.05$ , one-way ANOVA test;  $n=3$ ). The experiment was repeated three times with similar results.

(I) Growth of *Hpa* Noco2 on the local leaves of WT and OX-*SNIPER1* plants with or without nlp20 pretreatment. Three-week-old plants were pretreated with water (H<sub>2</sub>O) or 1  $\mu$ M nlp20 and sprayed with *Hpa* Noco2 spores (50,000 spores/ml) 24 hours later. Infection was scored at 7 days post inoculation (dpi) by counting the number of conidiophores per infected leaf. A total of 15 plants were scored for each treatment. Disease rating scores are as follows: 0, no conidiophores on the infected leaves; 1, no more than 5 conidiophores on one infected leaf; 2, 6 to 20 conidiophores on one infected leaf; 3, 20 or more conidiophores on one infected leaf; 4, 5 or more conidiophores on two infected leaves; 5, 20 or more conidiophores on two infected leaves. This experiment was repeated twice with similar results.

(J) Growth of *Hpa* Noco2 on the distal leaves of WT and OX-*SNIPER1* plants in an SAR assay. 15 plants were used for each treatment. Disease symptoms were scored 7 dpi by counting the number of conidiophores on the distal leaves. Disease ratings: 0, no conidiophores on plants; 1, one leaf is infected with no more than five conidiophores; 2, one leaf is infected with more than five conidiophores; 3, two leaves are infected but with no more than five conidiophores on each infected leaf; 4, two leaves are infected with more than five conidiophores on each infected leaf; 5, more than two leaves are infected with more than five conidiophores. The experiment was repeated twice with similar results.

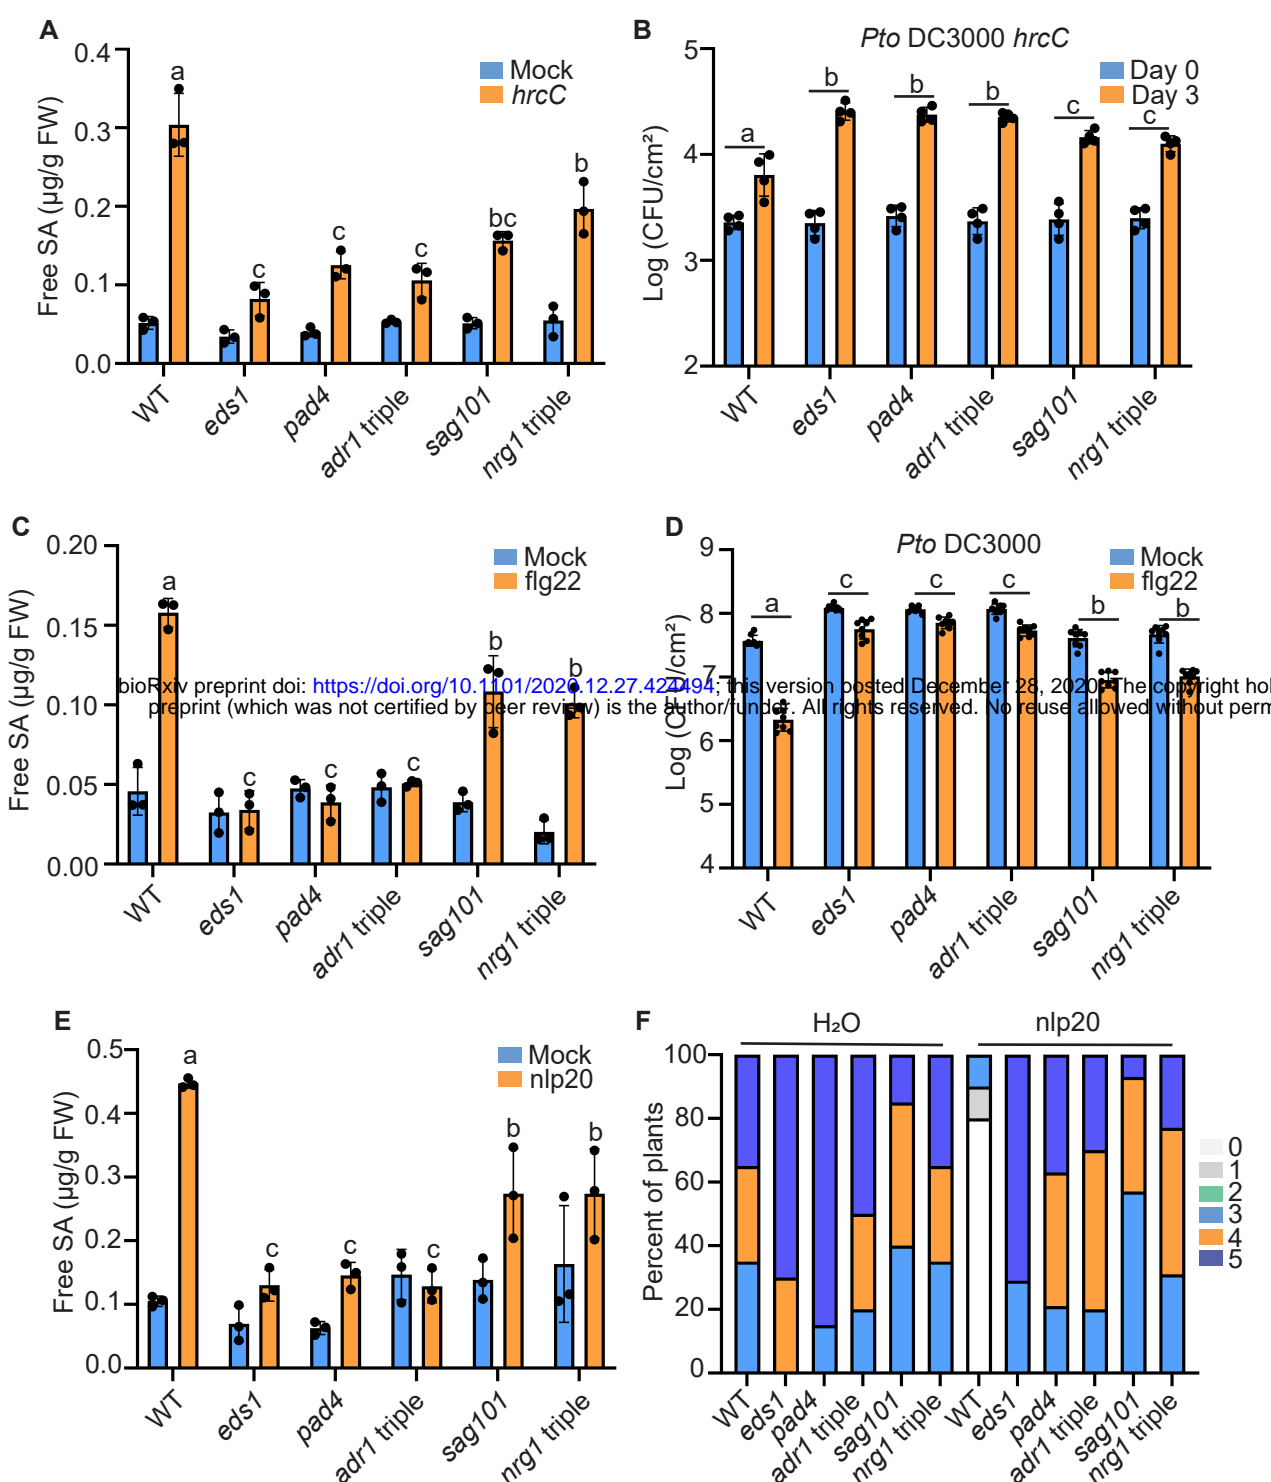

**Figure 2. Contributions of TIR signaling components to *Pto DC3000 hrcC*, flg22 and nlp20-induced immunity.**

(A) Levels of free SA in four-week-old soil-grown WT, *eds1-24*, *pad4-1*, *sag101-1*, *adr1* triple and *nrg1* triple mutants 12 hours after treatment with 10 mM MgCl<sub>2</sub> or *Pto DC3000 hrcC* (OD<sub>600</sub>=0.05) for 12 hours. Different letters indicate genotypes with statistical differences ( $p < 0.05$ , one-way ANOVA test;  $n=3$ ). The experiment was repeated three times with similar results.

(B) Growth of *Pto DC3000 hrcC* in 25-day-old soil-grown plants of the indicated genotypes. Leaf discs were collected 0 days (Day 0) or 3 days (Day 3) after *Pto DC3000 hrcC* (OD<sub>600</sub>=0.002) infiltration. Error bars represent SD from four biological replicates. The growth of *Pto DC3000 hrcC* in different genotypes was compared using two-way ANOVA test, and different letters indicate genotypes with statistical differences ( $p < 0.05$ ,  $n = 4$ ). The experiment was repeated twice with similar results.

(C) Levels of free SA in four-week-old soil-grown plants of the indicated genotypes after treatment with water or 1  $\mu\text{M}$  flg22 for 9 hours. Different letters indicate genotypes with statistical differences ( $p < 0.05$ , one-way ANOVA test;  $n=3$ ). The experiment was repeated three times with similar results.

(D) Growth of *Pto DC3000* in the leaves of four-week-old WT, *eds1-24*, *pad4-1*, *sag101-1*, *adr1* triple and *nrg1* triple mutant plants after treatment with water or 1  $\mu\text{M}$  flg22. 24 hours later, the same treated leaves were infiltrated with *Pto DC3000*. Samples were taken 3 days after *Pto DC3000* inoculation. Error bars represent SD from six biological replicates. The flg22-induced protection among different genotypes was compared using two-way ANOVA test, and different letters indicate genotypes with statistical differences ( $p < 0.05$ ,  $n = 6$ ). The experiment was repeated twice with similar results.

(E) Levels of free SA in four-week-old soil-grown plants of the indicated genotypes after treatment with water (mock) or 1  $\mu\text{M}$  nlp20 for 24h. Different letters indicate genotypes with statistical differences ( $p < 0.05$ , one-way ANOVA test;  $n=3$ ). The experiment was repeated three times with similar results.

(F) Growth of *Hpa Noco2* on the local leaves of the indicated plants. Three-week-old soil-grown plants were pretreated with water or 1  $\mu\text{M}$  nlp20 and sprayed with *Hpa Noco2* spores (50,000 spores/ml) 24 hours later. Disease ratings are as described in Fig 1. The experiment was repeated twice with similar results.

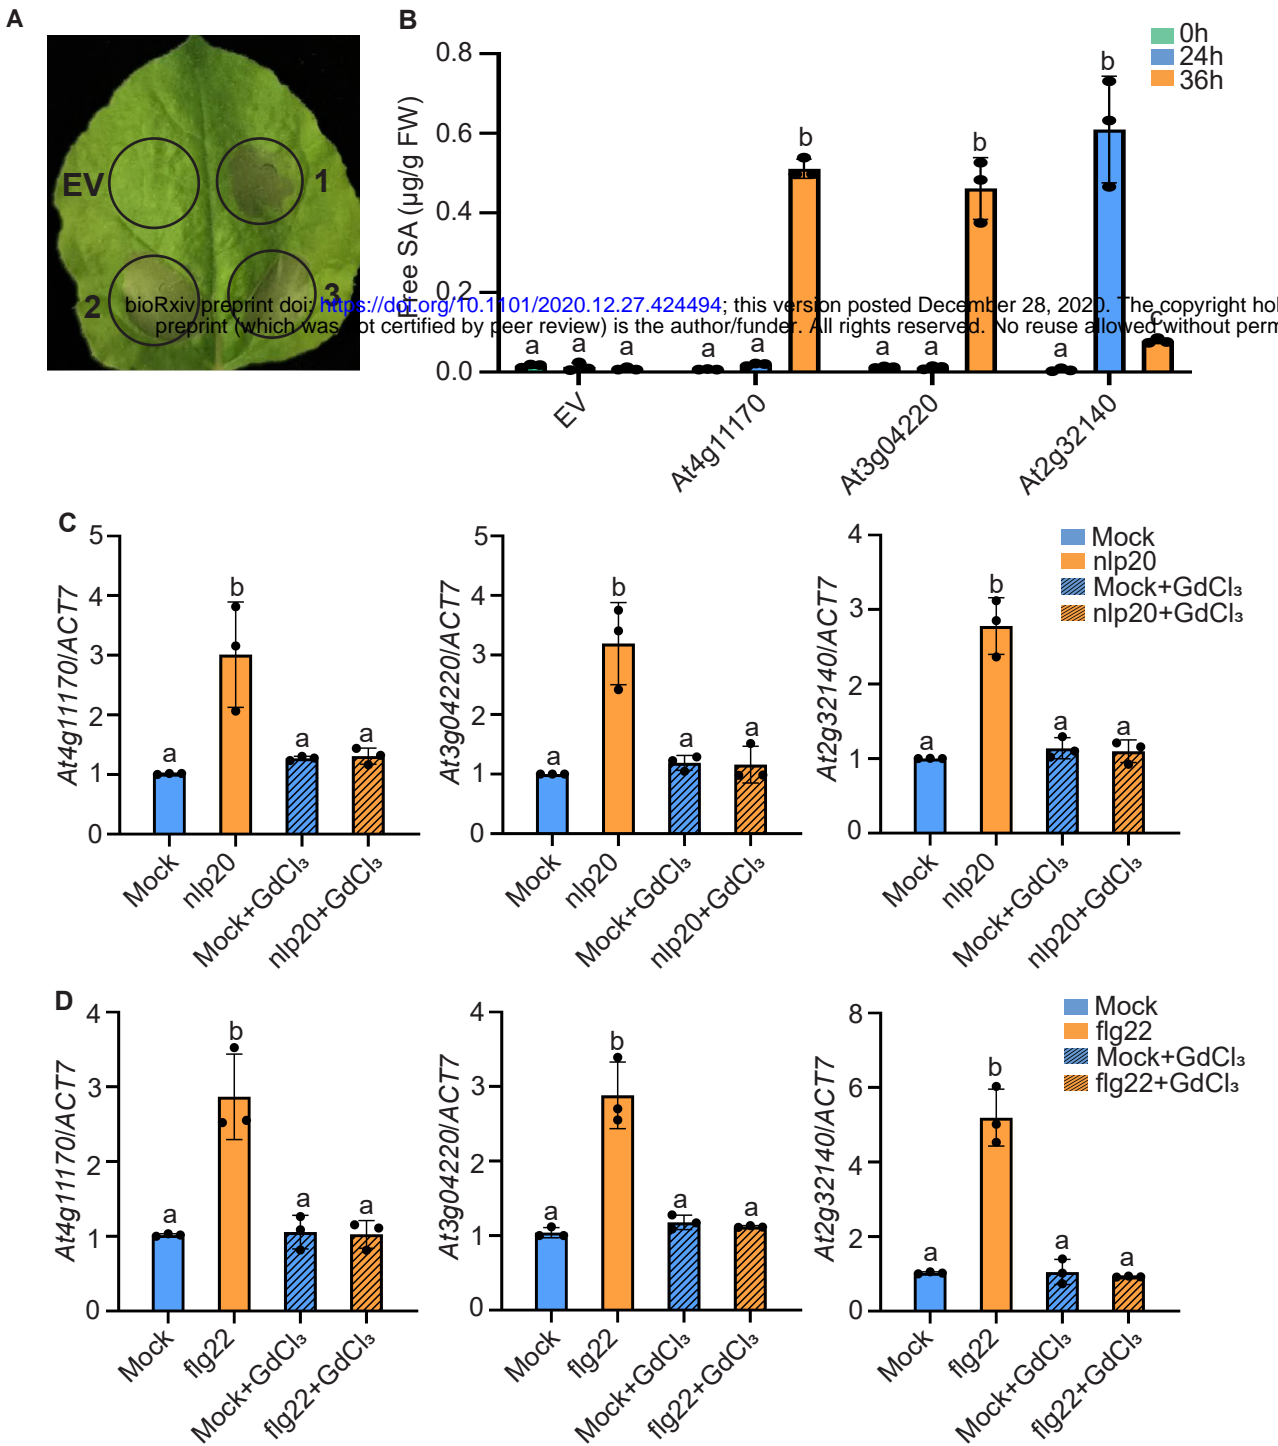

**Figure 3. Overexpression of *TIR* genes activates SA biosynthesis in *N. benthamiana*.**

(A) Hypersensitive response (HR) in the *N. benthamiana* leaves expressing the *TIR* genes *At4g11170*, *At3g04220* or *At2g32140* through *Agrobacterium tumefaciens* GV3101 (OD600=0.4) infiltration. Photographs were taken 3 days after *Agrobacterium* infiltration. The empty vector (EV) treatment serves as control; 1, *At4g11170*; 2, *At3g04220*; 3, *At2g32140*.

(B) Levels of free SA in *N. benthamiana* leaves after infiltration of *Agrobacterium* (OD600=0.4) carrying the *TIR* genes from (A). Samples were collected 24 and 36 hours post infiltration, before HR was visible. Error bars represent SD from three biological replicates. Different letters indicate different time course with statistical differences ( $p < 0.05$ , one-way ANOVA test;  $n=3$ ).

(C, D) Induction of the indicated *TIR* genes by nlp20 (C) or flg22 (D). Ten-day-old plate-grown WT plants were transplanted to water 1 day before for recovery and then pretreated with water (Mock) or 100  $\mu\text{M}$  GdCl<sub>3</sub> for 1 hour. Samples were collected 1 hour after supplying with 1  $\mu\text{M}$  nlp20 or 1  $\mu\text{M}$  flg22. qPCR was used to examine the genes expression level. *ACT7* was used for normalization. Error bars represent SD from three different biological replicates. Different letters indicate different treatment with statistical differences ( $p < 0.05$ , one-way ANOVA test;  $n=3$ ) All the experiments were repeated twice with similar results.

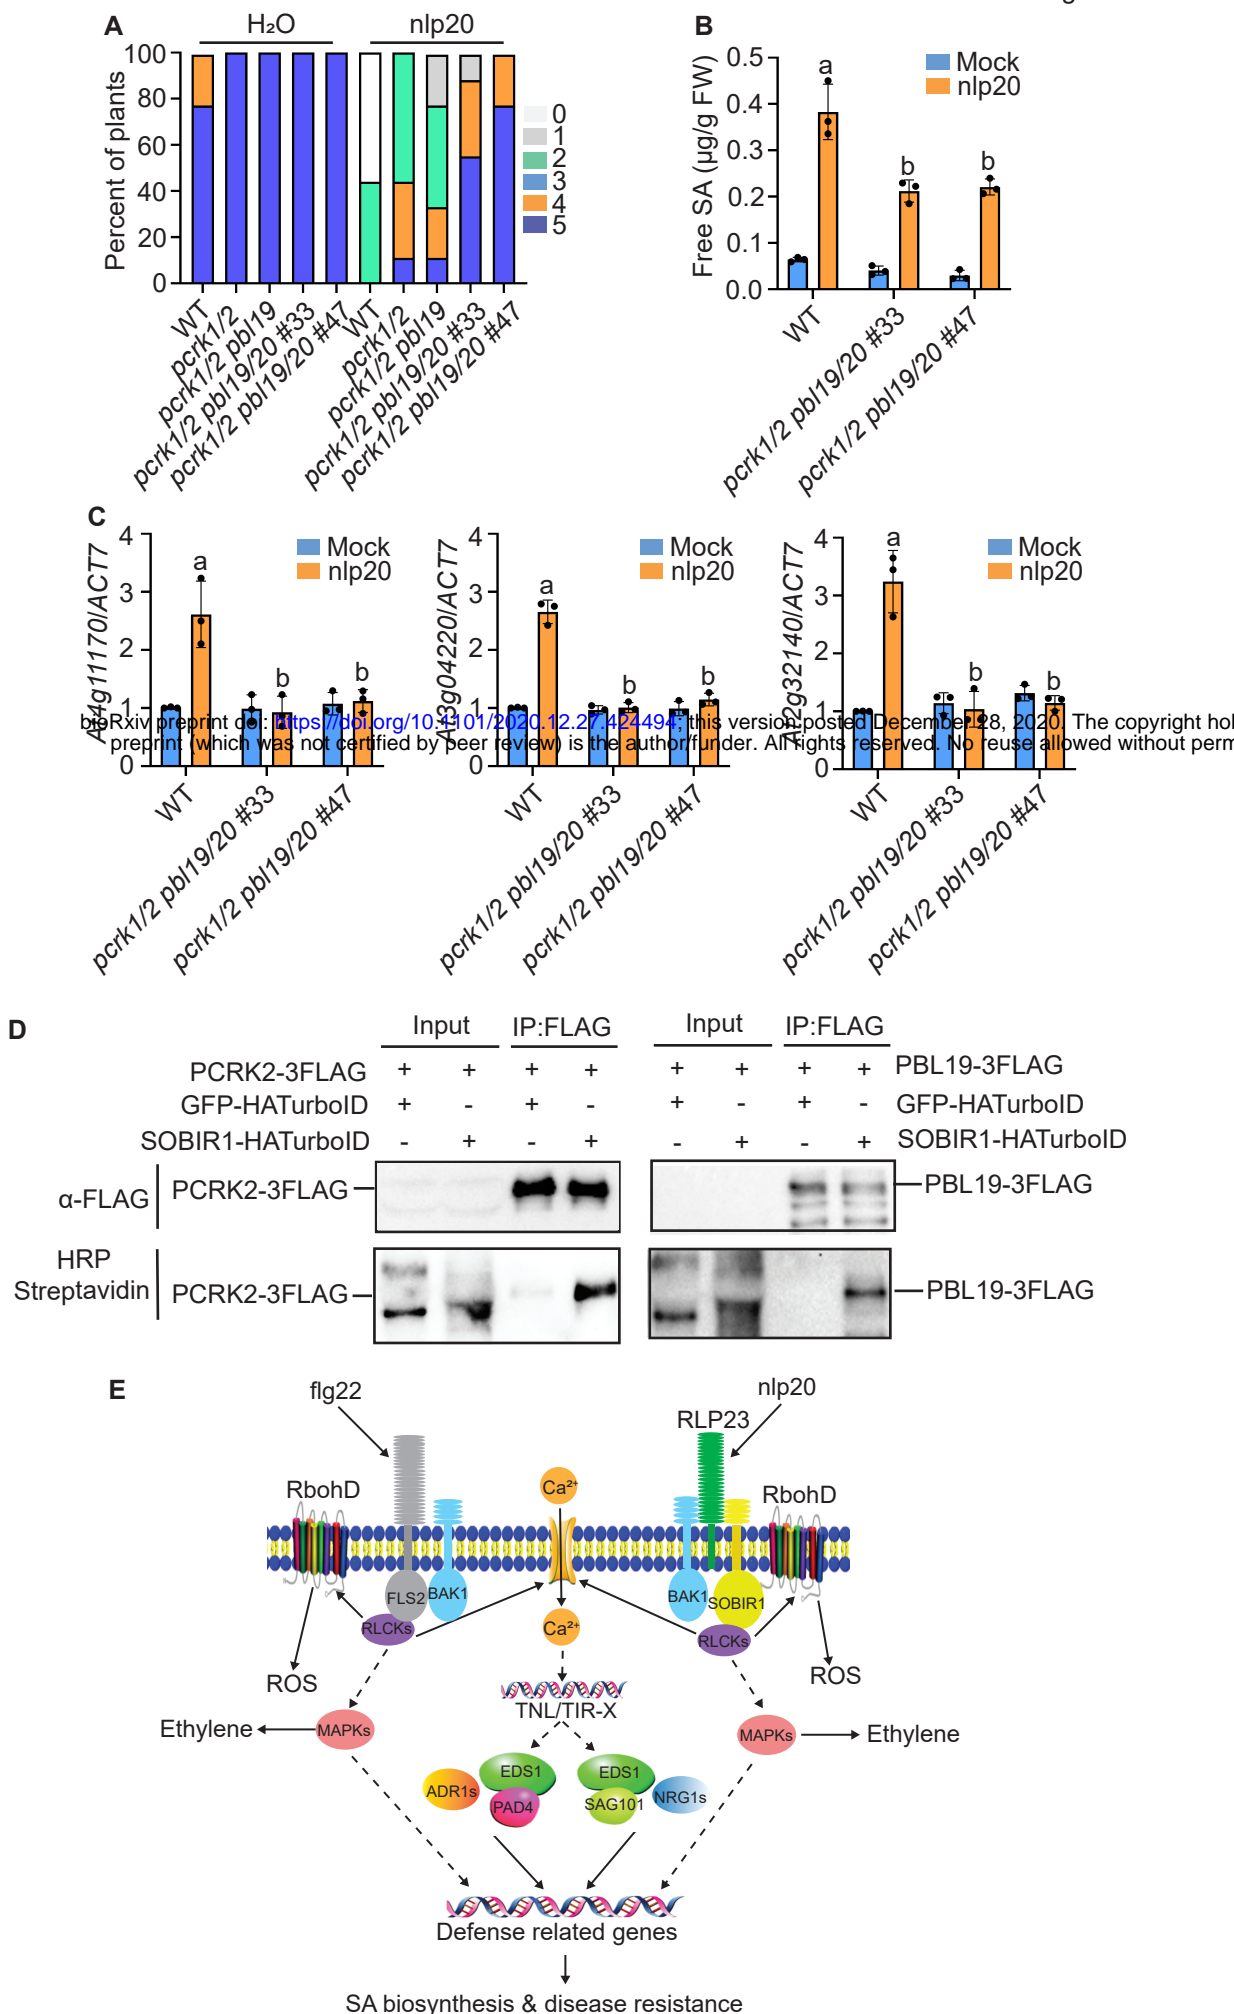

**Figure 4. PCRK1/2 and PBL19/20 are required for nlp20-induced immunity.**

(A) Growth of *Hpa Noco2* on the distal leaves of WT, *pcrk1/2*, *pcrk1/2 pbl19*, *pcrk1/2 pbl19/20 #33* and *pcrk1/2 pbl19/20 #47* quadruple mutant plants. 21-d-old soil-grown plants were treated with 1  $\mu$ M nlp20 and sprayed *Hpa Noco2* spores (50,000 spores/ml) 24 hours later. The detail method was described in Fig 2F.

(B) Levels of free SA in four-week-old soil-grown plants of the indicated genotypes treated with water or 1  $\mu$ M nlp20. Samples were collected 24 hours post elicitor treatment. Different letters indicate genotypes with statistical differences ( $p < 0.05$ , one-way ANOVA test;  $n=3$ ).

(C) The induction of *At4g11170*, *At3g04220* and *At2g32140* (*TIR* genes) in the indicated genotypes. Total RNA was isolated from seedlings of 10-d-old plate-grown plants 1 h after treatment with 1  $\mu$ M nlp20. *ACT7* was used for normalization, and the expression of each gene in mock-treated WT was set as 1. Error bars represent SD from three different biological replicates. Different letters indicate genotypes with statistical differences ( $p < 0.05$ , one-way ANOVA test;  $n=3$ ).

(D) Immunoprecipitation and biotinylation of PCRK2/PBL19-3FLAG by SOBIR1-HATurboID in *N. benthamiana*. *Agrobacterium* carrying the indicated constructs were infiltrated into *N. benthamiana* leaves for protein expression. Immunoprecipitation was carried out with anti-FLAG beads. The 3FLAG-tagged proteins were detected using an anti-FLAG antibody. The biotinylated proteins were detected using HRP-Streptavidin. The experiments in (A-D) were repeated twice with similar results.

(E) A working model for the contribution of TIR signaling in PTI. Upon perception of pathogen elicitors such as flg22 and nlp20, PRRs activate early immune responses such as ROS production, MAPK activation and  $Ca^{2+}$  influx through RLCKs. Elevated cytosolic  $Ca^{2+}$  levels induce the expression of a large number of TIR genes, leading to activation of downstream defense pathways through the EDS1/PAD4/ADR1s and EDS1/SAG101/NRG1s signaling modules. Activation of TIR signaling further induces downstream defense gene expression, resulting in increased SA biosynthesis and enhanced resistance to pathogens. In parallel, activation of MAPKs promotes the biosynthesis of ethylene.

figure S1

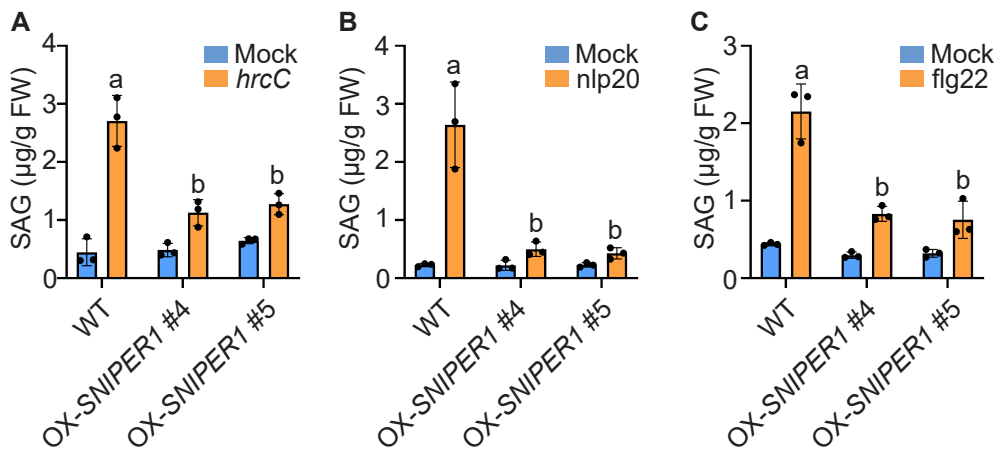

**Figure S1. Levels of glucose-conjugated SA (SAG) in WT and OX-SNIPER1 plants.**

(A) SAG levels in four-week-old soil-grown WT and OX-SNIPER1 plants treated with 10 mM MgCl<sub>2</sub> (mock) or Pto DC3000 *hrcC*.

(B, C) SAG levels in 25-d-old plants WT and OX-SNIPER1 plants treated with H<sub>2</sub>O (mock), 1 µM *nlp20* (B) or 1 µM *flg22* (C). Samples were collected for SAG measurement 24 hr after 1 µM *nlp20*, or 9 hr after 1 µM *flg22* treatment. Different letters indicate genotypes with statistical differences ( $p < 0.05$ , one-way ANOVA test;  $n=3$ ).

All the experiments were repeated three times with similar results.

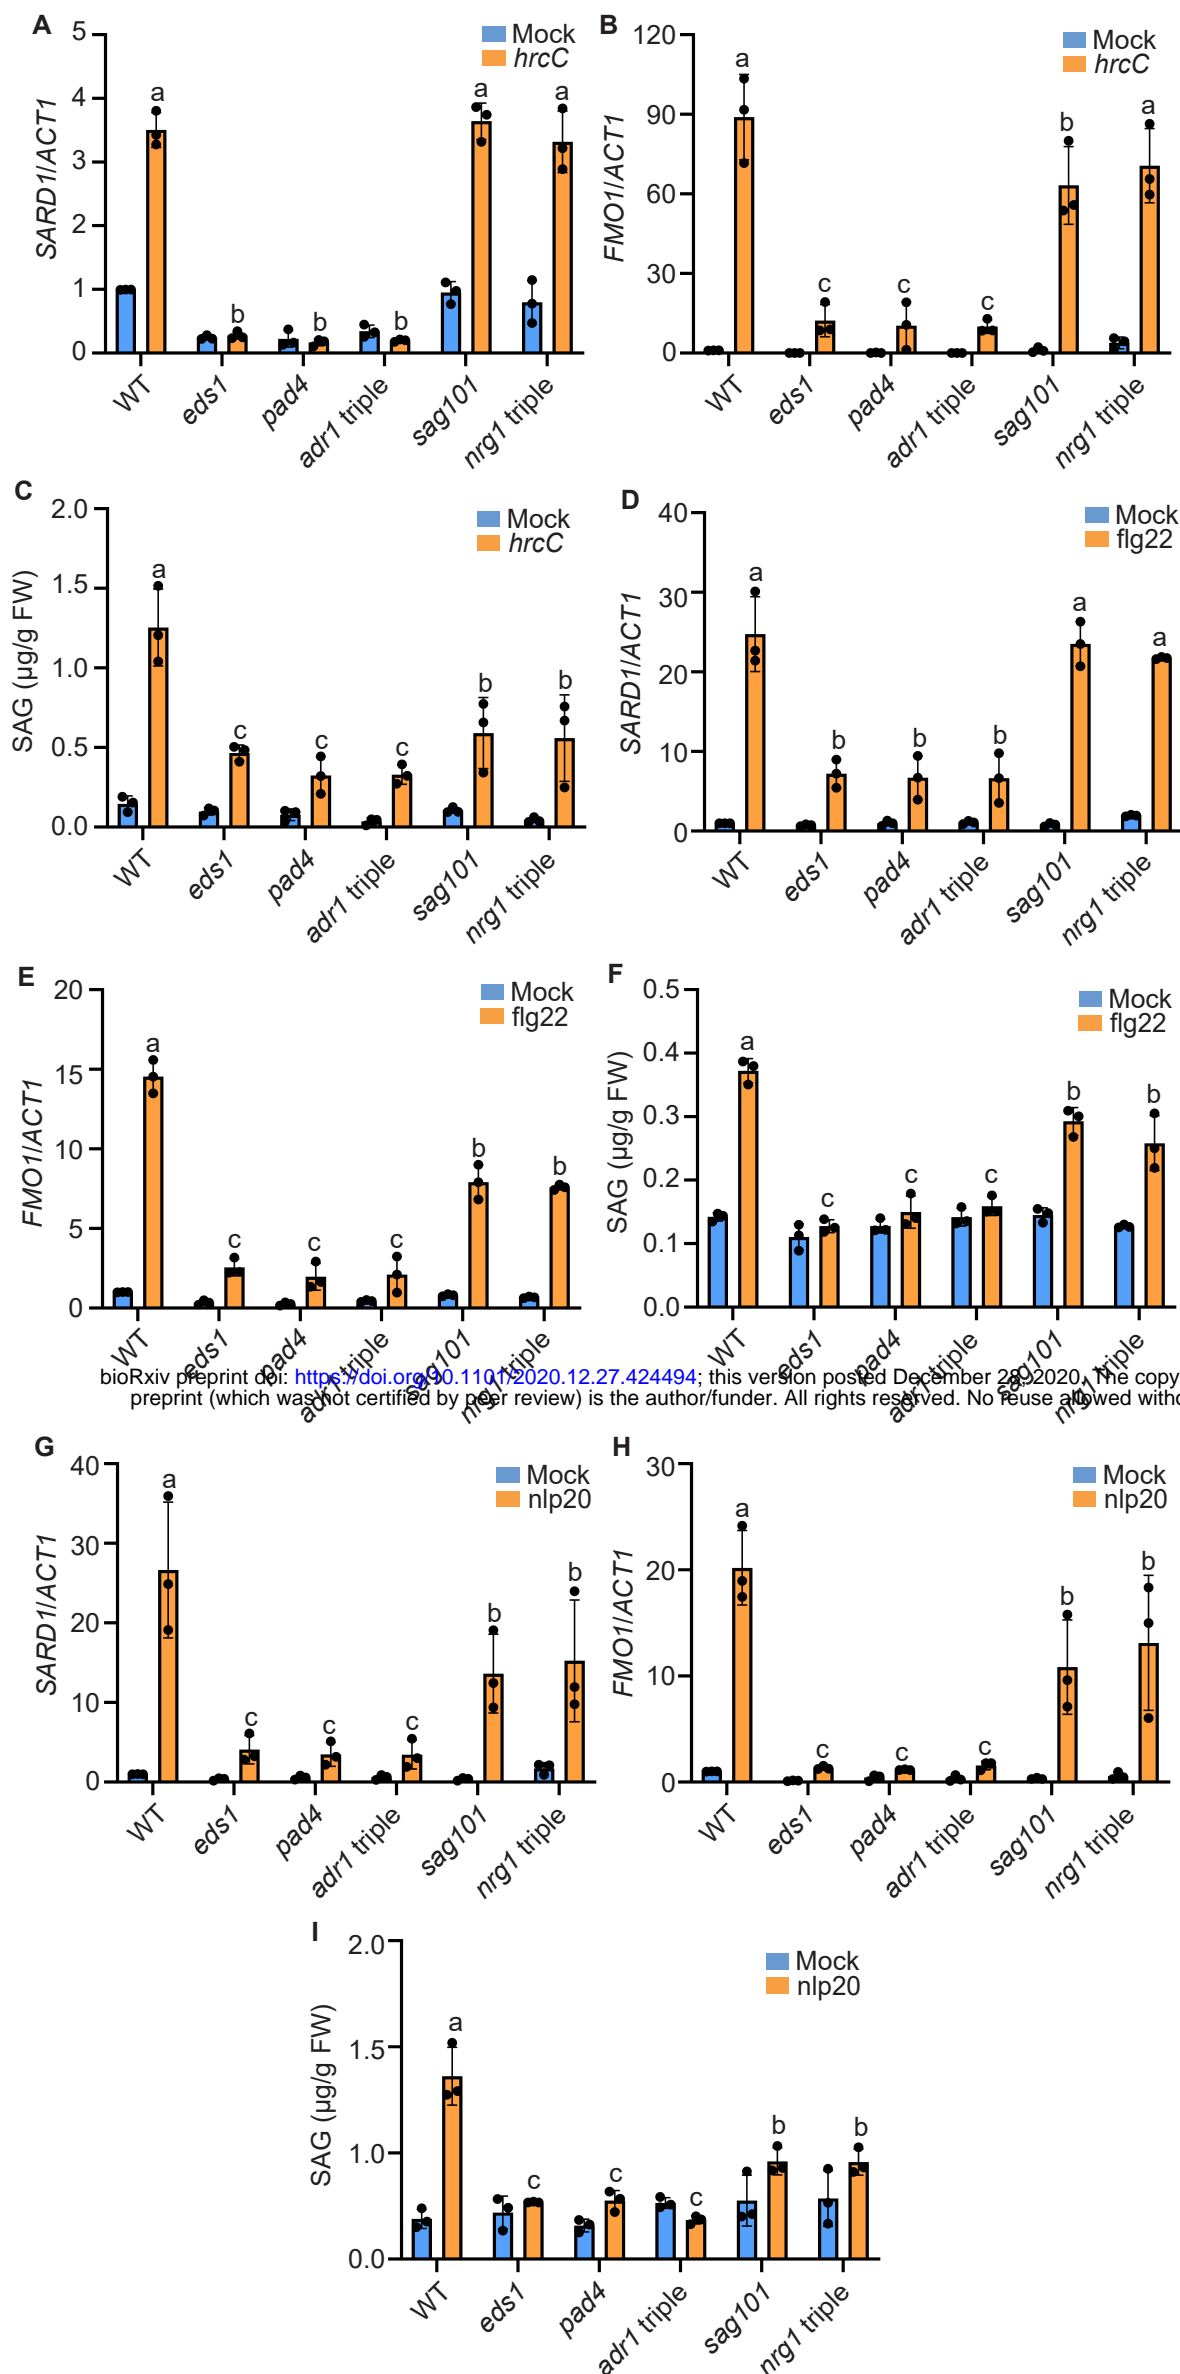

**Figure S2. Induction of *SARD1* and *FMO1* gene expression and SAG production in TIR signaling mutants upon *Pto* DC3000 *hrcC*, *flg22* or *nlp20* treatment.**

(A, B) Relative expression levels of *SARD1* (A) and *FMO1* (B) in WT, *eds1-24*, *pad4-1*, *sag101-1*, *adr1* *adr-L1* *adr-L2* (*adr1* triple) and *nrg1a* *nrg1b* *nrg1c* (*nrg1* triple) mutant plants after treatment with *Pto* DC3000 *hrcC* (OD600 = 0.05) for 12 hours. Error bars represent SD from three different biological replicates. Different letters indicate genotypes with statistical differences ( $p < 0.05$ , one-way ANOVA test;  $n=3$ ).

(C, F, I) Four-week-old soil-grown plants of the indicated genotypes were treated with *Pto* DC3000 *hrcC* (OD600=0.05) (D), 1  $\mu\text{M}$  *flg22* (F) or 1  $\mu\text{M}$  *nlp20* (I). Samples were collected for SAG measurement 12 hr after inoculation of *Pto* DC3000 *hrcC*, 24 hr after treatment with 1  $\mu\text{M}$  *nlp20*, or 9 hr after treatment with 1  $\mu\text{M}$  *flg22*. Different letters indicate genotypes with statistical differences ( $p < 0.05$ , one-way ANOVA test;  $n=3$ ). The experiment was repeated three times with similar results.

(D, E) Relative expression levels of *SARD1* (D) and *FMO1* (E) in the indicated genotypes upon *flg22* treatment. Total RNA was isolated from 12-d-old plate-grown seedlings 4 h after spraying with 1  $\mu\text{M}$  *flg22*. Different letters indicate genotypes with statistical differences ( $p < 0.05$ , one-way ANOVA test;  $n=3$ ).

(G, H) Relative expression levels of *SARD1* (G) and *FMO1* (H) in the indicated genotypes upon *nlp20* treatment. Total RNA was isolated from 12-d-old plate-grown seedlings 4 h after spraying with 1  $\mu\text{M}$  *nlp20*. Different letters indicate genotypes with statistical differences ( $p < 0.05$ , one-way ANOVA test;  $n=3$ ).

For gene expression analysis in (A, B, D, E, G, H), the expression of each gene in the mock-treated WT plants was set as 1. All gene expression analyses were repeated twice with similar results.

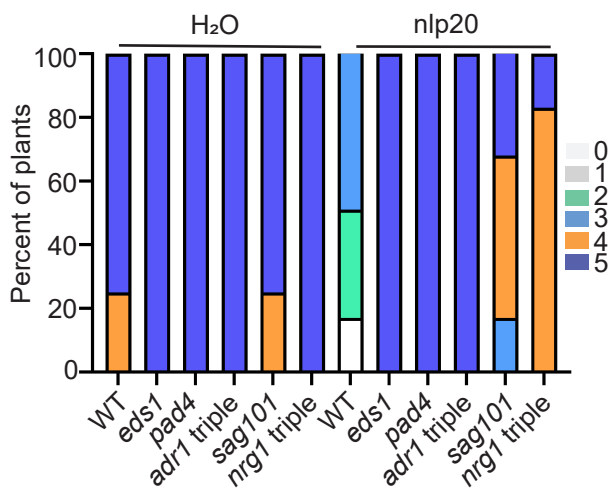

**Figure S3. Growth of *Hpa Noco2* on the distal leaves of TIR signaling mutants.**

Three-week-old soil-grown plants were pretreated with water or 1  $\mu$ M nlp20 and sprayed with *Hpa Noco2* spores (50,000 spores/ml) 24 hours later. Disease ratings are as described in Fig 1. The experiment was repeated twice with similar results.

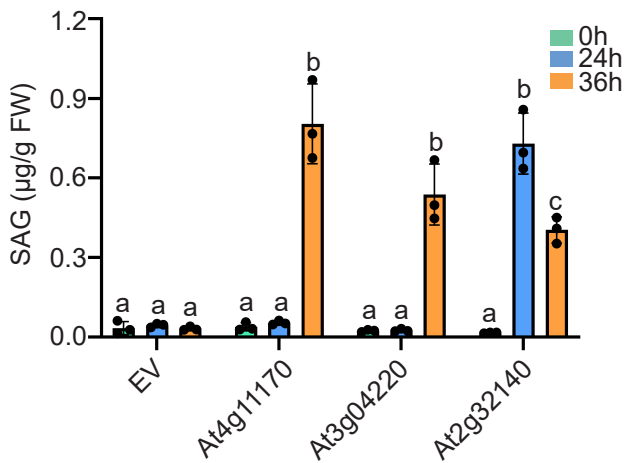

**Figure S4. Levels of glucose-conjugated SA (SAG) in *N. benthamiana* leaves after infiltration of *Agrobacterium* carrying the TIR genes.**

Samples were collected 24 and 36 hours post infiltration of the bacteria (OD600=0.4) before HR was visible. Different letters indicate statistical differences ( $p < 0.05$ , one-way ANOVA test;  $n=3$ ) compared with the empty vector control. The experiment was repeated twice with similar results.



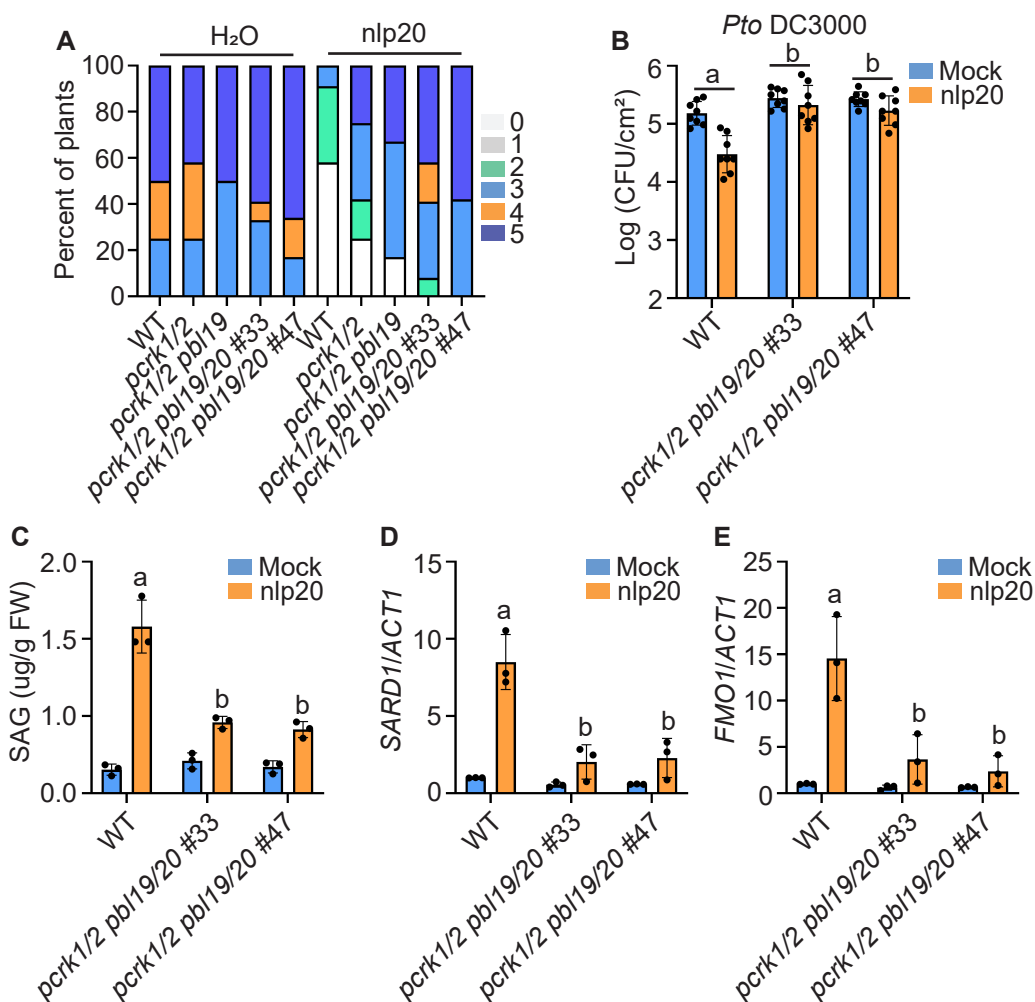

**Figure S5. nlp20-induced immune responses are compromised in *pcrk1/2 pbl19/20* quadruple mutant plants.**

(A) Growth of *Hpa Noco2* on the local leaves of WT, *pcrk1/2*, *pcrk1/2 pbl19*, *pcrk1/2 pbl19/20 #33* and *pcrk1/2 pbl19/20 #47* quadruple mutant plants after 1  $\mu$ M nlp20 treatment. Infection was scored 7 dpi by counting the number of conidiophores per infected leaf. Detailed methodology was described in Fig 2E.

(B) Growth of *Pto DC3000* in the leaves of four-week-old WT, *pcrk1/2 pbl19/20 #33* and *pcrk1/2 pbl19/20 #47* quadruple mutant plants pre-treated with water or 1  $\mu$ M nlp20. 24 hours post elicitor treatment, the treated leaves were infiltrated with *Pto DC3000* (OD<sub>600</sub>=0.001). Samples were taken 3 days after *Pto DC3000* inoculation. Error bars represent SD from six biological replicates. The nlp20-induced protection among different genotypes was compared using two-way ANOVA test, and different letters indicate genotypes with statistical differences ( $p < 0.05$ ,  $n=6$ ).

(C) Levels of SAG in four-week-old soil-grown plants of the indicated genotypes treated with water or 1  $\mu$ M nlp20. Samples were collected 24 hours post elicitor treatment. Different letters indicate statistical differences ( $p < 0.05$ , one-way ANOVA test;  $n=3$ ).

(D, E) Relative expression levels of *SARD1* (D) and *FMO1* (E) in the indicated genotypes. Total RNA extracted from 12-d-old plate-grown plants treated with 1  $\mu$ M nlp20 for 4h. *ACT1* was used for normalization, and the expression of each gene in mock-treated WT was set as 1. Error bars represent SD from three different biological replicates. Different letters indicate genotypes with statistical differences ( $p < 0.05$ , one-way ANOVA test;  $n=3$ ).

All the experiments were repeated twice with similar results.

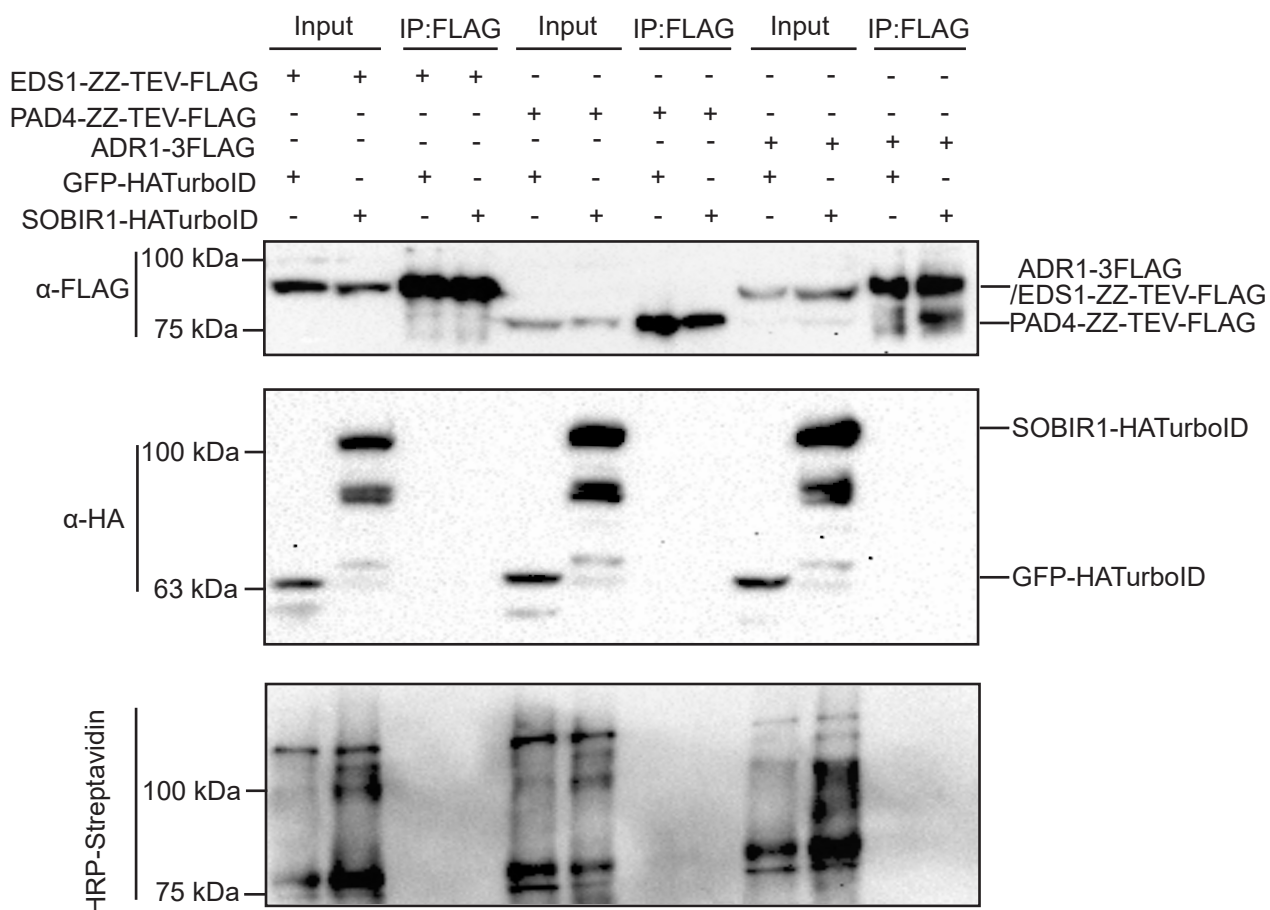

**Figure S6. Analysis of interactions between SOBIR1 and EDS1/PAD4/ADR1 by TurboID and co-immunoprecipitation analysis.**

Agrobacterium carrying the indicated constructs were infiltrated into *N. benthamiana* leaves for protein expression. Immunoprecipitation of EDS1-FLAG-ZZ, PAD4-FLAG-ZZ or ADR1-3FLAG was carried out with anti-FLAG beads. The 3FLAG-tagged and HATurboID fusion proteins were detected by western blot using an anti-FLAG or anti-HA antibody by western blot. The biotinylated proteins were detected by western blot using HRP-Streptavidin. Molecular mass marker in kiloDaltons is indicated on the left. The experiment was repeated twice with similar results.

**Table S1. TIR-domain containing genes induced by nlp20 treatment for 1 hour compared with H<sub>2</sub>O treatment for 1 hour.**

| Gene ID   | Log2(Fold Change) | Adjusted p-value | Gene Name | Description                                              |
|-----------|-------------------|------------------|-----------|----------------------------------------------------------|
| AT1G66090 | 4.182314          | 2.11E-10         |           | Disease resistance protein (TIR-NBS class)               |
| AT2G32140 | 3.410955          | 6.12E-04         |           | Transmembrane receptor                                   |
| AT3G04220 | 2.978868          | 5.65E-06         |           | Disease resistance protein (TIR-NBS-LRR class) family    |
| AT5G41750 | 2.702796          | 1.29E-04         |           | Disease resistance protein (TIR-NBS-LRR class) family    |
| AT3G04210 | 2.613868          | 1.24E-08         |           | At3g04210/T6K12_17                                       |
| AT2G20142 | 2.309786          | 1.93E-03         |           | Toll-Interleukin-Resistance (TIR) domain family protein  |
| AT4G19520 | 2.105768          | 7.57E-06         |           | Probable disease resistance protein At4g19520            |
| AT5G22690 | 1.954292          | 1.70E-05         |           | Disease resistance protein (TIR-NBS-LRR class) family    |
| AT1G72900 | 1.927421          | 1.63E-03         |           | Similar to part of disease resistance protein            |
| AT1G17600 | 1.866072          | 1.21E-04         |           | Disease resistance protein (TIR-NBS-LRR class) family    |
| AT1G65390 | 1.706482          | 1.64E-03         | PP2A5     | Protein PHLOEM PROTEIN 2-LIKE A5                         |
| AT2G16870 | 1.65859           | 4.47E-04         |           | Disease resistance protein (TIR-NBS-LRR class) family    |
| AT5G44870 | 1.635193          | 7.33E-07         | LAZ5      | Disease resistance protein LAZ5                          |
| AT1G56540 | 1.63069           | 2.20E-04         |           | Disease resistance protein (TIR-NBS-LRR class) family    |
| AT5G41740 | 1.585872          | 1.39E-03         |           | Disease resistance protein (TIR-NBS-LRR class) family    |
| AT4G36150 | 1.514324          | 2.73E-03         |           | Disease resistance protein (TIR-NBS-LRR class) family    |
| AT4G16960 | 1.493714          | 5.81E-04         |           | Disease resistance protein (TIR-NBS-LRR class) family    |
| AT1G72940 | 1.456181          | 4.55E-03         |           | At1g72940/F3N23_14                                       |
| AT5G46510 | 1.382137          | 1.87E-04         |           | Disease resistance protein (TIR-NBS-LRR class) family    |
| AT5G46470 | 1.323092          | 5.59E-05         | RPS6      | Disease resistance protein RPS6                          |
| AT4G16860 | 1.316684          | 2.28E-03         | RPP4      | Disease resistance protein RPP4                          |
| AT3G44630 | 1.296601          | 3.67E-03         |           | Disease resistance protein (TIR-NBS-LRR class) family    |
| AT4G36140 | 1.190924          | 1.25E-04         |           | Disease resistance protein (TIR-NBS-LRR class)           |
| AT1G31540 | 1.073651          | 9.72E-04         |           | Disease resistance protein (TIR-NBS-LRR class) family    |
| AT5G45250 | 1.06893           | 1.61E-03         | RPS4      | Disease resistance protein RPS4                          |
| AT4G16890 | 0.86282           | 4.61E-03         | SNC1      | disease resistance protein (TIR-NBS-LRR class), putative |

**Table S2. TIR-domain containing genes induced by nlp20 treatment for 6 hours compared with H<sub>2</sub>O treatment for 6 hours.**

| Gene ID   | Log2(Fold Change) | Adjusted p-value | Gene Name | Description                                             |
|-----------|-------------------|------------------|-----------|---------------------------------------------------------|
| AT1G57630 | 7.14555           | 3.84E-06         |           | Disease resistance protein RPP1-WsB, putative           |
| AT4G11170 | 4.73465           | 4.44E-04         |           | Putative disease resistance protein At4g11170           |
| AT5G45090 | 3.91362           | 1.51E-02         | PP2A7     | Uncharacterized protein PHLOEM PROTEIN 2-LIKE A7        |
| AT1G47370 | 3.62641           | 2.83E-02         |           | Toll-Interleukin-Resistance (TIR) domain family protein |
| AT2G32140 | 3.59523           | 1.72E-02         |           | Transmembrane receptor                                  |
| AT5G41750 | 3.33276           | 2.23E-04         |           | Disease resistance protein (TIR-NBS-LRR class) family   |
| AT1G66090 | 3.02848           | 4.22E-04         |           | Disease resistance protein (TIR-NBS class)              |
| AT1G72920 | 2.84247           | 3.10E-03         |           | Similar to part of disease resistance protein           |
| AT5G45000 | 2.74362           | 1.49E-02         |           | Disease resistance protein (TIR-NBS-LRR class) family   |
| AT2G20142 | 2.4793            | 2.51E-02         |           | Toll-Interleukin-Resistance (TIR) domain family protein |
| AT3G04220 | 2.28377           | 2.68E-02         |           | Disease resistance protein (TIR-NBS-LRR class) family   |
| AT5G58120 | 1.90423           | 9.43E-03         |           | Disease resistance protein (TIR-NBS-LRR class) family   |
| AT5G41740 | 1.71984           | 1.75E-02         |           | Disease resistance protein (TIR-NBS-LRR class) family   |
| AT1G72900 | 1.71688           | 8.78E-02         |           | Similar to part of disease resistance protein           |

**Table S3. TIR-domain containing genes induced by flg22 treatment for 30 min compared with untreated\*.**

| Gene ID   | Log2(Fold Change) | Adjusted p-value | Gene Name | Description                                             |
|-----------|-------------------|------------------|-----------|---------------------------------------------------------|
| AT1G66090 | 23.2              | 2.52E-54         |           | Disease resistance protein (TIR-NBS class)              |
| AT1G65390 | 19.4              | 0.00E+00         | PP2A5     | Protein PHLOEM PROTEIN 2-LIKE A5                        |
| AT4G19520 | 12.3              | 0.00E+00         |           | Probable disease resistance protein At4g19520           |
| AT5G41750 | 12.3              | 2.09E-168        |           | Disease resistance protein (TIR-NBS-LRR class) family   |
| AT5G41740 | 11.6              | 3.96E-217        |           | Disease resistance protein (TIR-NBS-LRR class) family   |
| AT1G72900 | 10                | 3.40E-31         |           | Similar to part of disease resistance protein           |
| AT2G32140 | 8.9               | 1.59E-31         |           | Transmembrane receptor                                  |
| AT2G20142 | 8.8               | 1.73E-08         |           | Toll-Interleukin-Resistance (TIR) domain family protein |
| AT4G14370 | 8.4               | 1.20E-76         |           | Disease resistance protein (TIR-NBS-LRR class) family   |
| AT5G44910 | 6                 | 5.36E-23         |           | Similarity to disease resistance protein                |
| AT4G11170 | 5.7               | 5.69E-09         |           | Putative disease resistance protein At4g11170           |
| AT1G51270 | 5.7               | 3.59E-66         |           | Vesicle-associated protein 1-4                          |
| AT1G63860 | 5.5               | 8.73E-63         |           | Disease resistance protein (TIR-NBS-LRR class) family   |
| AT5G22690 | 5.3               | 9.39E-61         |           | Disease resistance protein (TIR-NBS-LRR class) family   |
| AT1G63750 | 5.1               | 5.65E-42         |           | Disease resistance protein (TIR-NBS-LRR class) family   |
| AT3G04220 | 4.8               | 1.52E-08         |           | Disease resistance protein (TIR-NBS-LRR class) family   |
| AT1G72920 | 4.3               | 1.41E-15         |           | Similar to part of disease resistance protein           |
| AT1G57630 | 4.3               | 1.46E-04         |           | Disease resistance protein RPP1-WsB, putative           |
| AT1G56540 | 3.9               | 1.62E-11         |           | Disease resistance protein (TIR-NBS-LRR class) family   |
| AT3G44630 | 3.9               | 9.70E-104        |           | Disease resistance protein (TIR-NBS-LRR class) family   |
| AT1G56510 | 3.9               | 8.21E-75         | ADR2      | Disease resistance protein ADR2                         |
| AT1G72940 | 3.7               | 1.46E-36         |           | At1g72940/F3N23_14                                      |
| AT4G16960 | 3.6               | 1.53E-31         |           | Disease resistance protein (TIR-NBS-LRR class) family   |
| AT3G04210 | 3.4               | 2.85E-11         |           | At3g04210/T6K12_17                                      |

|           |     |          |       |                                                          |
|-----------|-----|----------|-------|----------------------------------------------------------|
| AT1G31540 | 3.3 | 2.24E-46 |       | Disease resistance protein (TIR-NBS-LRR class) family    |
| AT5G58120 | 3.3 | 8.42E-38 |       | Disease resistance protein (TIR-NBS-LRR class) family    |
| AT5G46470 | 3.2 | 4.95E-73 | RPS6  | Disease resistance protein RPS6                          |
| AT1G72910 | 3.1 | 1.35E-29 |       | Similar to part of disease resistance protein            |
| AT4G16860 | 3   | 7.19E-62 | RPP4  | Disease resistance protein RPP4                          |
| AT1G72930 | 2.7 | 5.91E-48 | TIR   | Toll/interleukin-1 receptor-like protein                 |
| AT5G46510 | 2.7 | 1.22E-33 |       | Disease resistance protein (TIR-NBS-LRR class) family    |
| AT4G16940 | 2.5 | 1.31E-07 |       | Disease resistance protein (TIR-NBS-LRR class) family    |
| AT5G46520 | 2.4 | 5.56E-17 |       | Disease resistance protein (TIR-NBS-LRR class) family    |
| AT5G40910 | 2.4 | 1.88E-31 |       | Disease resistance protein (TIR-NBS-LRR class) family    |
| AT3G44400 | 2.3 | 3.00E-04 |       | Disease resistance protein (TIR-NBS-LRR class) family    |
| AT1G56520 | 2.2 | 3.45E-08 |       | Disease resistance protein (TIR-NBS-LRR class) family    |
| AT1G17600 | 2.1 | 2.21E-02 |       | Disease resistance protein (TIR-NBS-LRR class) family    |
| AT5G45070 | 2   | 3.02E-02 | PP2A8 | Protein PHLOEM PROTEIN 2-LIKE A8                         |
| AT5G11250 | 2   | 8.32E-06 |       | Disease resistance protein (TIR-NBS-LRR class)           |
| AT2G16870 | 1.9 | 9.09E-02 |       | Disease resistance protein (TIR-NBS-LRR class) family    |
| AT5G41550 | 1.9 | 2.70E-01 |       | Disease resistance protein (TIR-NBS-LRR class) family    |
| AT5G44870 | 1.9 | 1.07E-10 | LAZ5  | Disease resistance protein LAZ5                          |
| AT4G16890 | 1.8 | 2.93E-22 | SNC1  | Disease resistance protein (TIR-NBS-LRR class), putative |
| AT3G44480 | 1.7 | 5.62E-17 | RPP1  | Disease resistance protein (TIR-NBS-LRR class) family    |
| AT1G72950 | 1.7 | 6.74E-01 |       | Disease resistance protein (TIR-NBS class)               |
| AT1G63740 | 1.7 | 3.23E-02 |       | Disease resistance protein (TIR-NBS-LRR class) family    |

\*subset directly from Li et al., 2015 Cell Host and Microbe. DOI:10.1016/j.chom.2014.10.018

**Table S4. Sequences of primers used in this study.**

| Primer         | 5'-3' sequence                                           | purpose          |
|----------------|----------------------------------------------------------|------------------|
| PCRK1-F        | GAAGTGAATGCAGAACTTAC                                     | genotyping       |
| PCRK1-R        | GAGAATCGCCCAAGATGCAG                                     | genotyping       |
| PCRK2-F        | TTGGTGATCTTAAATCTGCC                                     | genotyping       |
| PCRK2-R        | ACCAAGTTTGAATGCTCGAC                                     | genotyping       |
| PBL19-F        | TCCATCAAATTCCTACTGGTT                                    | genotyping       |
| PBL19-R        | AACCAAAGCCTCTCGATCC                                      | genotyping       |
| EDS1-DelPCR-F  | AGAACGTAAGACAGGGTTTG                                     | genotyping       |
| EDS1-DelPCR-R  | GATGGAGTCTATATTAAGAGACG                                  | genotyping       |
| EDS1-Pres-F    | ACAAGCCAAAGTGCAAGCC                                      | genotyping       |
| EDS1-Pres-R    | CAAGCATCCCTTCTAATGTC                                     | genotyping       |
| Actin1-F       | CGATGAAGCTCAATCCAAACGA                                   | RT-PCR           |
| Actin1-R       | CAGAGTCGAGCACAATACCG                                     | RT-PCR           |
| SARD1-RT-F     | TCAAGGCGTTGTGGTTTGTG                                     | RT-PCR           |
| SARD1-RT-R     | CGTCAACGACGGATAGTTTC                                     | RT-PCR           |
| FMO1-RT-F      | TGCCTTTATACAGGGGAACA                                     | RT-PCR           |
| FMO1-RT-R      | TGGAAATGCAATGACGTTTG                                     | RT-PCR           |
| EDS1-BsF       | ATATATGGTCTCGATTGCTAACCGAGCGCTATCACAGTT                  | pHEE401E         |
| EDS1-F0        | TGCTAACCGAGCGCTATCACAGTTTTAGAGCTAGAAATAGC                | pHEE401E         |
| EDS1-R0        | AACAAGGGAGATGTATTCTCCGCAATCTCTTAGTCGACTCTAC              | pHEE401E         |
| EDS1-BsR       | ATTATTGGTCTCGAAACAAGGGAGATGTATTCTCCGC                    | pHEE401E         |
| PBL20-DT1-BsF0 | ATATATGGTCTCGATTGCCAAAATCCAGAGGAAATAGTTTTAGAGCTAGAAATAG  | pHEE401E         |
| PBL20-DT2-BsR0 | ATTATTGGTCTCGAAACTAGCAATTGGATACTTATTCAATCTCTTAGTCGACTCTA | pHEE401E         |
| PCRK2-Kpn1-F   | CCGGGTACCATGAAATGCTTCTTATCCCTCT                          | pBASTA-35S-3FLAG |

|               |                                   |                         |
|---------------|-----------------------------------|-------------------------|
| PCRK2-spe1-R  | AAAGAATGTGAGAGCTTGACTAGTAGGCCTAGA | pBASTA-35S-3FLA<br>G    |
| PBL19-Kpn1-F  | CCGGGGTACCATGAACTGTCTGTTCTTGTTTC  | pBASTA-35S-3FLA<br>G    |
| PBL19-BamH1-R | GGCCGGATCCTCCTCTGACACTAACCCCT     | pBASTA-35S-3FLA<br>G    |
| ADR1-Kpn1-F   | GCGCGGTACCATGGCTTCGTTTCATAGATC    | pBASTA-35S-3FLA<br>G    |
| ADR1-Sall-R   | CGCGTCTGACTAATCGTCAAGCCAATCC      | pBASTA-35S-3FLA<br>G    |
| EDS1-Kpn1-F   | CGGGGTACCATGGCGTTTGAAGCTCTTAC     | Pcambia1305-FLA<br>G-ZZ |
| EDS1-Xba1-R   | CCGCCGTCTAGAGGTATCTGTTATTCATCCATC | Pcambia1305-FLA<br>G-ZZ |
| PAD4-Kpn1-F   | CGGGGTACCATGGACGATTGTCGATTCGAG    | Pcambia1305-FLA<br>G-ZZ |
| PAD4-BamHI-R  | CGCGGATCCAGTCTCCATTGCGTCACTCTC    | Pcambia1305-FLA<br>G-ZZ |
